# Supplementary material for: Comparative transcriptome analysis of roots, stems and leaves of Isodon amethystoides reveals candidate genes involved in Wangzaozins biosynthesis
Source: BMC Plant Biol. 2018 Nov 8;18:272. doi: 10.1186/s12870-018-1505-0 (PMC6225716; doi:10.1186/s12870-018-1505-0)
Supplement: Supplementary file 10 — Table S6. GO enrichment of unigenes. (XLS 8009 kb) [file 12870_2018_1505_MOESM10_ESM.xls]

## Sheet:  cellular component
	Supplementary Table S6 GO enrichment of unigenes
#GO_classify	Unigenes_gene_num	Unigenes_gene_ids
>cellular component
extracellular region	1988	DN88516_c0_g1;DN36514_c1_g1;DN71203_c0_g1;DN37091_c0_g1;DN63450_c4_g1;DN6371_c0_g2;DN21752_c0_g2;DN65215_c0_g1;DN6648_c0_g1;DN73030_c0_g1;DN35609_c0_g2;DN6420_c0_g1;DN63081_c1_g1;DN31076_c0_g1;DN45557_c0_g1;DN17509_c0_g1;DN85409_c0_g1;DN48985_c0_g1;DN76697_c0_g1;DN55202_c0_g3;DN87677_c0_g1;DN33359_c0_g1;DN79853_c0_g1;DN80593_c0_g1;DN70512_c0_g1;DN24494_c0_g1;DN49384_c0_g1;DN79647_c0_g1;DN59931_c1…
_c0_g1;DN27693_c0_g1;DN89329_c0_g1;DN85710_c0_g1;DN36608_c0_g1;DN9296_c0_g1;DN77915_c0_g1;DN74465_c0_g1;DN57827_c0_g1;DN84870_c0_g1;DN88015_c0_g1;DN75448_c0_g1;DN50465_c0_g1;DN37004_c0_g1;DN38173_c0_g2;DN26170_c0_g1;DN18596_c0_g1;DN63310_c0_g2;DN61795_c2_g1;DN36040_c0_g3;DN49617_c0_g1;DN58067_c0_g2;DN71086_c0_g1;DN39631_c0_g1;DN302_c0_g1;DN77178_c0_g1;DN15412_c0_g2;DN80082_c0_g1;DN37350_c0_g1;DN6…
cell	23485	DN55288_c1_g1;DN34116_c0_g1;DN49313_c0_g2;DN53771_c0_g2;DN46831_c0_g1;DN87939_c0_g1;DN13765_c0_g1;DN64220_c1_g2;DN44867_c0_g2;DN45236_c0_g3;DN49692_c2_g2;DN84878_c0_g1;DN38527_c0_g1;DN50433_c0_g2;DN47271_c0_g1;DN87465_c0_g1;DN32013_c0_g1;DN58813_c0_g11;DN64516_c0_g2;DN55903_c1_g2;DN42834_c0_g1;DN62787_c0_g2;DN59351_c0_g2;DN38919_c0_g1;DN78073_c0_g1;DN55510_c0_g1;DN69715_c0_g1;DN90884_c0_g2;DN6154…
RINITY_DN63646_c0_g1;DN44266_c1_g1;DN62040_c0_g2;DN59806_c0_g1;DN77440_c0_g1;DN63933_c0_g1;DN29451_c0_g1;DN15976_c0_g2;DN63257_c0_g2;DN51785_c0_g1;DN78948_c0_g1;DN61447_c0_g1;DN59170_c0_g1;DN55354_c0_g2;DN63545_c0_g1;DN90451_c0_g1;DN3565_c0_g1;DN72952_c0_g1;DN56904_c1_g2;DN83949_c0_g1;DN62804_c0_g3;DN47085_c0_g1;DN47097_c1_g1;DN64159_c1_g4;DN38340_c0_g1;DN3538_c0_g1;DN46907_c0_g1;DN22612_c0_g1;DN…
;DN66911_c0_g1;DN27879_c0_g2;DN55892_c0_g6;DN63716_c0_g5;DN53537_c0_g1;DN52278_c5_g1;DN6090_c0_g1;DN51768_c0_g5;DN49524_c1_g2;DN62296_c0_g4;DN66497_c0_g1;DN27550_c0_g1;DN53321_c0_g1;DN68049_c0_g1;DN5274_c0_g1;DN41004_c0_g1;DN49198_c0_g1;DN88921_c0_g1;DN60381_c1_g6;DN23324_c0_g1;DN15129_c0_g1;DN65142_c0_g1;DN82111_c0_g1;DN54495_c0_g1;DN77862_c0_g1;DN70047_c0_g1;DN54211_c0_g3;DN4267_c0_g1;DN58050_c…
6_c1_g1;DN55447_c0_g2;DN10490_c0_g1;DN48876_c0_g1;DN46057_c0_g1;DN46788_c0_g1;DN60317_c0_g1;DN60845_c0_g1;DN80508_c0_g1;DN44266_c0_g1;DN66022_c0_g1;DN83456_c0_g1;DN4140_c0_g1;DN62022_c0_g1;DN27451_c0_g1;DN6890_c0_g1;DN39507_c0_g3;DN42063_c0_g1;DN57761_c1_g1;DN52738_c0_g1;DN59662_c0_g1;DN10253_c0_g1;DN43809_c0_g1;DN74762_c0_g1;DN50333_c1_g2;DN63990_c0_g4;DN50315_c0_g1;DN75352_c0_g1;DN54282_c0_g4;D…
1_c0_g1;DN55713_c0_g2;DN49203_c0_g1;DN53336_c0_g1;DN43835_c1_g2;DN42414_c0_g1;DN45225_c0_g1;DN48628_c0_g1;DN59279_c0_g1;DN83053_c0_g1;DN76699_c0_g1;DN78824_c0_g1;DN91134_c0_g1;DN304_c0_g1;DN63366_c1_g2;DN47167_c1_g1;DN72258_c0_g1;DN41242_c0_g1;DN55582_c0_g1;DN50362_c0_g4;DN39418_c0_g1;DN72117_c0_g1;DN86173_c0_g1;DN76735_c0_g1;DN69630_c0_g1;DN80620_c0_g1;DN5308_c0_g1;DN61868_c0_g7;DN74333_c0_g1;DN…
DN51008_c0_g1;DN44405_c0_g1;DN40890_c0_g1;DN49331_c0_g1;DN55155_c0_g4;DN55106_c2_g6;DN86198_c0_g1;DN58434_c0_g6;DN78308_c0_g1;DN44857_c0_g1;DN89622_c0_g1;DN53743_c0_g2;DN59147_c0_g5;DN42880_c1_g1;DN55476_c0_g1;DN80284_c0_g1;DN47847_c0_g5;DN58095_c0_g1;DN56847_c0_g1;DN64800_c5_g4;DN48626_c0_g1;DN12691_c1_g1;DN79993_c0_g1;DN60128_c0_g3;DN60876_c0_g2;DN43923_c1_g1;DN77719_c0_g1;DN53055_c1_g3;DN88473…
;DN80600_c0_g1;DN57598_c0_g4;DN15665_c0_g1;DN57631_c0_g1;DN58939_c0_g1;DN88941_c0_g1;DN65415_c0_g1;DN39193_c0_g1;DN58625_c0_g2;DN36234_c0_g1;DN68614_c0_g1;DN43264_c0_g1;DN78706_c0_g1;DN60338_c0_g1;DN65424_c0_g1;DN12386_c0_g1;DN83061_c0_g1;DN74358_c0_g1;DN65144_c0_g1;DN37593_c0_g1;DN27381_c0_g1;DN40297_c0_g1;DN15601_c0_g1;DN34909_c0_g1;DN57133_c0_g1;DN71656_c0_g1;DN55888_c0_g2;DN52811_c0_g1;DN8056…
ITY_DN19334_c0_g1;DN74661_c0_g1;DN85306_c0_g1;DN36065_c0_g1;DN72088_c0_g1;DN9024_c0_g1;DN48816_c0_g1;DN34210_c0_g1;DN47349_c0_g1;DN53239_c0_g2;DN61211_c3_g1;DN15830_c0_g1;DN67272_c0_g1;DN17973_c0_g1;DN69101_c0_g1;DN55267_c0_g1;DN29510_c0_g1;DN83042_c0_g1;DN70478_c0_g2;DN53390_c0_g1;DN84388_c0_g1;DN26107_c0_g1;DN29053_c0_g1;DN60092_c0_g2;DN75240_c0_g1;DN27391_c0_g1;DN61287_c0_g3;DN42455_c0_g1;DN82…
0_g1;DN50559_c0_g1;DN45326_c0_g1;DN45105_c0_g2;DN80514_c0_g1;DN53050_c2_g1;DN81682_c0_g1;DN50533_c0_g1;DN59407_c0_g2;DN13243_c0_g1;DN53636_c1_g12;DN52158_c0_g1;DN64714_c4_g1;DN52342_c0_g2;DN17404_c0_g1;DN61636_c0_g1;DN74117_c0_g1;DN18144_c0_g2;DN50132_c0_g2;DN88705_c0_g1;DN52056_c0_g1;DN61059_c0_g1;DN7473_c0_g2;DN78619_c0_g1;DN15779_c0_g1;DN49003_c0_g1;DN13107_c1_g1;DN30731_c0_g1;DN52249_c0_g2;DN…
DN35102_c0_g1;DN74961_c0_g1;DN71177_c0_g1;DN25208_c0_g1;DN63749_c0_g3;DN75235_c0_g1;DN49230_c0_g1;DN58598_c0_g3;DN55343_c0_g1;DN86218_c0_g1;DN81739_c0_g1;DN89261_c0_g1;DN63814_c1_g1;DN63727_c1_g1;DN8876_c0_g1;DN56927_c1_g1;DN37307_c0_g1;DN86343_c0_g1;DN78351_c0_g1;DN64_c0_g1;DN79243_c0_g1;DN7150_c0_g2;DN43264_c0_g2;DN43734_c1_g1;DN28473_c0_g1;DN55464_c0_g1;DN21519_c0_g1;DN6777_c0_g1;DN49536_c0_g1…
INITY_DN86074_c0_g1;DN13937_c0_g1;DN56233_c0_g1;DN49083_c1_g3;DN54207_c2_g3;DN76752_c0_g1;DN36534_c0_g1;DN67397_c0_g1;DN41454_c0_g2;DN83742_c0_g1;DN59634_c1_g2;DN50278_c0_g1;DN40331_c0_g1;DN89873_c0_g1;DN26749_c0_g1;DN48617_c0_g2;DN81004_c0_g1;DN58790_c0_g1;DN77358_c0_g1;DN84706_c0_g1;DN48012_c0_g1;DN64850_c1_g4;DN65708_c0_g1;DN4792_c0_g1;DN80716_c0_g1;DN20130_c0_g1;DN54146_c0_g1;DN71933_c0_g1;DN…
_g2;DN43513_c0_g1;DN51774_c1_g1;DN38228_c0_g2;DN83762_c0_g1;DN78510_c0_g1;DN48757_c0_g1;DN47574_c0_g1;DN78436_c0_g1;DN70397_c0_g1;DN62414_c0_g10;DN55008_c0_g1;DN7172_c0_g1;DN29302_c0_g2;DN336_c0_g1;DN35685_c1_g1;DN83627_c0_g1;DN59957_c1_g3;DN16148_c0_g1;DN91292_c0_g1;DN25466_c0_g2;DN4876_c0_g1;DN83499_c0_g1;DN31452_c1_g1;DN38063_c0_g1;DN12529_c0_g1;DN10059_c0_g1;DN50501_c0_g1;DN65801_c0_g1;DN1878…
_g1;DN49999_c0_g2;DN38076_c0_g1;DN64676_c1_g4;DN84223_c0_g1;DN76674_c0_g1;DN58407_c0_g2;DN18110_c0_g2;DN55310_c2_g4;DN63754_c1_g7;DN56917_c0_g2;DN53728_c0_g1;DN79270_c0_g1;DN11162_c0_g3;DN68435_c0_g1;DN29862_c0_g2;DN88757_c0_g1;DN89006_c0_g1;DN21119_c0_g1;DN73996_c0_g1;DN39399_c0_g1;DN64866_c1_g2;DN13129_c0_g2;DN26161_c0_g1;DN88747_c0_g1;DN28213_c0_g2;DN48342_c0_g1;DN84956_c0_g1;DN59121_c0_g4;DN9…
84_c0_g1;DN48648_c1_g1;DN59121_c0_g3;DN30507_c0_g1;DN55061_c0_g1;DN27463_c0_g1;DN40171_c0_g1;DN62006_c1_g1;DN70289_c0_g1;DN63839_c1_g1;DN59291_c0_g1;DN62624_c1_g2;DN57354_c0_g1;DN30889_c0_g1;DN58765_c0_g4;DN73681_c0_g1;DN79388_c0_g1;DN34275_c0_g1;DN47143_c0_g1;DN28183_c0_g1;DN39009_c0_g1;DN33556_c0_g1;DN38456_c0_g2;DN37071_c1_g1;DN33673_c0_g1;DN44621_c0_g1;DN68113_c0_g1;DN25171_c0_g1;DN50251_c0_g…
0_g1;DN69180_c0_g1;DN64142_c1_g3;DN80542_c0_g1;DN64318_c0_g5;DN61686_c3_g1;DN8388_c0_g1;DN19567_c0_g1;DN78710_c0_g1;DN39654_c0_g2;DN58152_c2_g1;DN57898_c0_g1;DN17964_c0_g1;DN35051_c0_g2;DN64030_c0_g1;DN14747_c0_g1;DN56843_c0_g1;DN50969_c0_g1;DN48277_c0_g1;DN59571_c0_g4;DN74937_c0_g1;DN79330_c0_g1;DN24046_c0_g1;DN57006_c1_g2;DN14295_c0_g2;DN36223_c0_g1;DN34272_c0_g1;DN30847_c0_g1;DN37432_c0_g1;DN2…
9607_c0_g1;DN83582_c0_g1;DN39881_c0_g1;DN85985_c0_g1;DN50522_c0_g1;DN82051_c0_g1;DN73499_c0_g1;DN61343_c0_g5;DN36117_c0_g1;DN62753_c0_g2;DN26612_c0_g1;DN75454_c0_g1;DN73822_c0_g1;DN30047_c0_g1;DN44965_c0_g5;DN71243_c0_g1;DN79242_c0_g1;DN85756_c0_g1;DN56198_c0_g1;DN28027_c0_g1;DN48300_c4_g1;DN6009_c0_g1;DN54157_c1_g3;DN89276_c0_g1;DN63582_c0_g4;DN55731_c0_g1;DN60376_c0_g1;DN13319_c0_g1;DN60864_c0_…
nucleoid	123	DN77842_c0_g1;DN5022_c0_g1;DN73013_c0_g1;DN14420_c0_g1;DN29967_c0_g1;DN76442_c0_g1;DN29633_c0_g1;DN40805_c0_g4;DN57507_c2_g1;DN59562_c0_g1;DN18419_c0_g1;DN63118_c0_g1;DN65334_c0_g1;DN54533_c0_g2;DN72821_c0_g1;DN85586_c0_g1;DN5526_c0_g1;DN24914_c0_g2;DN51975_c0_g1;DN63431_c3_g2;DN42864_c0_g1;DN5363_c0_g1;DN68296_c0_g1;DN35096_c0_g2;DN24263_c0_g1;DN53579_c0_g1;DN57507_c2_g2;DN54250_c0_g2;DN39925_c0…
membrane	11328	DN59436_c0_g2;DN84818_c0_g1;DN49589_c1_g1;DN64736_c1_g4;DN60974_c2_g5;DN61906_c0_g2;DN7602_c0_g2;DN32181_c0_g2;DN64663_c0_g3;DN45777_c0_g1;DN38608_c1_g1;DN27391_c0_g2;DN56786_c0_g2;DN62767_c0_g2;DN331_c0_g2;DN45293_c0_g2;DN42719_c1_g2;DN72740_c0_g1;DN62473_c0_g1;DN49916_c0_g1;DN38144_c0_g1;DN49084_c0_g3;DN74724_c0_g1;DN56182_c0_g2;DN55552_c0_g3;DN69494_c0_g1;DN63672_c1_g3;DN61724_c0_g1;DN49332_c0…
DN28066_c1_g1;DN35512_c0_g1;DN55229_c0_g1;DN59049_c0_g1;DN59992_c0_g1;DN85517_c0_g1;DN86374_c0_g1;DN39286_c0_g1;DN84301_c0_g1;DN77024_c0_g1;DN90353_c0_g1;DN60720_c0_g1;DN41184_c0_g1;DN57092_c0_g1;DN58267_c0_g1;DN57826_c0_g1;DN43289_c0_g1;DN55537_c0_g1;DN63923_c0_g5;DN7414_c0_g1;DN28309_c0_g1;DN25127_c0_g1;DN11343_c0_g1;DN51945_c0_g1;DN30369_c0_g1;DN55515_c0_g6;DN38912_c0_g1;DN45491_c1_g1;DN11556_…
c0_g1;DN78765_c0_g1;DN84105_c0_g1;DN30949_c0_g1;DN28505_c0_g2;DN54287_c1_g1;DN26064_c0_g2;DN84197_c0_g1;DN87529_c0_g1;DN13355_c0_g1;DN67624_c0_g1;DN71481_c0_g1;DN20494_c0_g2;DN41518_c0_g2;DN49147_c0_g1;DN33641_c0_g1;DN59191_c0_g1;DN61019_c0_g1;DN87068_c0_g1;DN61059_c1_g2;DN63763_c0_g2;DN51689_c0_g1;DN30732_c1_g1;DN59174_c0_g1;DN46559_c0_g1;DN64241_c0_g2;DN83793_c0_g1;DN22484_c0_g3;DN48531_c0_g1;D…
TY_DN59020_c0_g1;DN53402_c1_g2;DN68495_c0_g1;DN61596_c0_g2;DN54380_c0_g1;DN73909_c0_g1;DN15056_c0_g1;DN55163_c0_g2;DN79053_c0_g1;DN54958_c0_g1;DN68072_c0_g1;DN8115_c0_g1;DN85951_c0_g1;DN78651_c0_g1;DN70260_c0_g1;DN53896_c0_g1;DN58151_c3_g2;DN88942_c0_g1;DN74665_c0_g1;DN88771_c0_g1;DN72443_c0_g1;DN32134_c0_g1;DN78098_c0_g1;DN34680_c0_g1;DN50839_c0_g1;DN26773_c0_g1;DN76631_c0_g1;DN89150_c0_g1;DN751…
_DN54200_c0_g1;DN63821_c1_g4;DN58721_c0_g1;DN73828_c0_g1;DN61101_c0_g3;DN18914_c1_g1;DN50876_c0_g5;DN34014_c0_g1;DN39696_c0_g1;DN85097_c0_g1;DN63330_c0_g1;DN28608_c0_g1;DN60272_c0_g1;DN49488_c0_g2;DN31001_c0_g1;DN49825_c0_g1;DN59333_c0_g1;DN37865_c0_g1;DN63015_c0_g4;DN62099_c1_g8;DN9227_c0_g1;DN64244_c0_g1;DN74896_c0_g1;DN50691_c0_g1;DN61994_c0_g1;DN54574_c0_g4;DN89567_c0_g1;DN38020_c0_g2;DN57806…
c0_g1;DN69287_c0_g1;DN61906_c0_g3;DN79804_c0_g1;DN60483_c0_g6;DN56918_c0_g2;DN64676_c0_g1;DN64398_c0_g1;DN33910_c0_g1;DN43546_c0_g1;DN44179_c0_g1;DN62307_c0_g2;DN46720_c0_g1;DN71631_c0_g1;DN61440_c0_g2;DN51583_c0_g2;DN71518_c0_g1;DN52163_c0_g1;DN59060_c0_g2;DN75365_c0_g1;DN71552_c0_g1;DN61390_c0_g2;DN64170_c0_g4;DN76311_c0_g1;DN11191_c0_g1;DN86793_c0_g1;DN55515_c0_g9;DN6741_c0_g1;DN63705_c0_g3;DN…
INITY_DN42171_c0_g2;DN31981_c0_g1;DN59326_c1_g1;DN86524_c0_g1;DN74352_c0_g1;DN302_c0_g1;DN79696_c0_g1;DN58067_c0_g2;DN37300_c1_g2;DN24263_c0_g1;DN63752_c0_g2;DN30969_c0_g1;DN72945_c0_g1;DN27429_c0_g1;DN33346_c0_g1;DN50399_c0_g3;DN49222_c2_g3;DN87532_c0_g1;DN51956_c0_g1;DN44124_c0_g1;DN17052_c0_g1;DN51324_c0_g1;DN6129_c0_g1;DN62669_c0_g1;DN61720_c0_g1;DN14804_c0_g1;DN55910_c0_g1;DN56093_c0_g3;DN77…
NITY_DN7001_c0_g1;DN53891_c0_g1;DN89216_c0_g1;DN64241_c0_g5;DN68867_c0_g1;DN63449_c1_g1;DN85878_c0_g1;DN85842_c0_g1;DN61640_c0_g1;DN78782_c0_g1;DN40677_c0_g1;DN60453_c1_g1;DN55782_c1_g3;DN41639_c0_g1;DN60668_c0_g1;DN61668_c0_g1;DN61300_c0_g5;DN44839_c0_g1;DN64344_c0_g3;DN57509_c0_g1;DN90690_c0_g1;DN401_c0_g1;DN29809_c0_g1;DN89980_c0_g1;DN90692_c0_g1;DN66786_c0_g1;DN30727_c0_g2;DN57374_c0_g1;DN391…
virion	163	DN24928_c0_g2;DN62828_c0_g1;DN50947_c0_g1;DN88646_c0_g1;DN57993_c1_g2;DN45619_c0_g2;DN50886_c1_g1;DN27455_c0_g1;DN59872_c0_g1;DN16121_c0_g1;DN88225_c0_g1;DN24583_c0_g1;DN79045_c0_g1;DN15870_c0_g1;DN5280_c0_g1;DN25210_c0_g1;DN89062_c0_g1;DN61002_c0_g1;DN59943_c0_g1;DN3777_c0_g1;DN52153_c0_g2;DN78019_c0_g1;DN54158_c0_g2;DN62828_c0_g2;DN44624_c0_g1;DN34744_c0_g1;DN56650_c0_g2;DN20806_c0_g1;DN50372_c…
cell junction	1075	DN68126_c0_g1;DN60223_c0_g1;DN53210_c0_g1;DN54368_c1_g1;DN41033_c0_g1;DN19572_c0_g1;DN48695_c0_g1;DN38224_c0_g2;DN5043_c0_g1;DN38884_c0_g1;DN61121_c0_g4;DN60435_c0_g1;DN47767_c0_g2;DN48553_c0_g1;DN73414_c0_g1;DN66747_c0_g1;DN89854_c0_g1;DN78392_c0_g1;DN41975_c1_g2;DN79219_c0_g1;DN62837_c0_g1;DN37693_c0_g1;DN38218_c0_g1;DN89962_c0_g1;DN70668_c0_g1;DN86341_c0_g1;DN74325_c0_g1;DN48699_c0_g1;DN36876_…
extracellular matrix	33	DN33012_c0_g2;DN31008_c0_g2;DN68072_c0_g1;DN53251_c0_g2;DN45718_c0_g1;DN78651_c0_g1;DN45775_c0_g1;DN37939_c0_g2;DN68734_c0_g1;DN74164_c0_g1;DN55658_c0_g3;DN45775_c1_g2;DN74164_c0_g2;DN44476_c0_g1;DN42558_c0_g1;DN55658_c0_g2;DN9900_c0_g1;DN34371_c0_g1;DN11816_c0_g1;DN13553_c0_g1;DN60209_c0_g1;DN41040_c0_g1;DN67407_c0_g1;DN58073_c0_g1;DN58502_c0_g1;DN45775_c1_g1;DN58502_c0_g2;DN40772_c0_g1;DN84337_…
membrane-enclosed lumen	963	DN14510_c0_g2;DN18383_c0_g1;DN63667_c1_g2;DN29082_c0_g1;DN50699_c0_g1;DN75659_c0_g1;DN53125_c0_g2;DN51697_c0_g1;DN55515_c0_g3;DN48035_c0_g1;DN60645_c4_g1;DN57596_c0_g3;DN53978_c0_g1;DN83064_c0_g1;DN88781_c0_g1;DN52337_c0_g1;DN66309_c0_g1;DN51823_c0_g1;DN64696_c1_g1;DN79083_c0_g1;DN62483_c0_g1;DN35441_c0_g1;DN17869_c0_g1;DN61313_c0_g1;DN25859_c0_g2;DN52969_c0_g1;DN84191_c0_g1;DN58152_c2_g6;DN36526…
macromolecular complex	7588	DN86715_c0_g1;DN55169_c0_g1;DN58853_c0_g1;DN46195_c0_g1;DN31146_c0_g1;DN50688_c0_g3;DN53118_c0_g3;DN55383_c1_g3;DN81766_c0_g1;DN63667_c1_g1;DN75929_c0_g1;DN56663_c0_g1;DN16342_c0_g1;DN37172_c0_g2;DN54046_c0_g1;DN28500_c0_g2;DN42228_c0_g1;DN60646_c0_g2;DN49347_c0_g1;DN71901_c0_g1;DN33258_c0_g1;DN83646_c0_g1;DN12969_c0_g1;DN76374_c0_g1;DN61258_c0_g2;DN69401_c0_g1;DN48516_c0_g2;DN48529_c0_g3;DN67384…
80_c0_g1;DN80186_c0_g1;DN39435_c0_g1;DN68625_c0_g1;DN42928_c0_g1;DN4750_c0_g2;DN4893_c0_g1;DN36765_c0_g2;DN55035_c0_g9;DN61754_c0_g3;DN42762_c0_g3;DN34811_c0_g2;DN60553_c0_g2;DN44486_c0_g2;DN71778_c0_g1;DN76516_c0_g1;DN41975_c1_g1;DN55262_c0_g3;DN8329_c0_g1;DN7532_c0_g1;DN64282_c2_g1;DN88341_c0_g1;DN585_c0_g1;DN54510_c0_g1;DN46307_c0_g1;DN68938_c0_g1;DN41049_c0_g1;DN90256_c0_g1;DN82284_c0_g1;DN60…
4303_c0_g2;DN31787_c0_g2;DN59362_c0_g2;DN23900_c0_g1;DN55111_c0_g3;DN20226_c0_g2;DN74797_c0_g1;DN25201_c0_g1;DN44942_c0_g1;DN8044_c0_g1;DN60718_c1_g1;DN33552_c0_g1;DN49488_c0_g1;DN32343_c0_g3;DN42979_c0_g3;DN13277_c0_g1;DN73154_c0_g1;DN38779_c0_g1;DN62904_c2_g1;DN32900_c0_g1;DN38456_c0_g1;DN36355_c0_g1;DN86974_c0_g1;DN81546_c0_g1;DN76615_c0_g1;DN17515_c0_g1;DN56885_c0_g1;DN47105_c0_g2;DN88857_c0_…
_DN55876_c0_g4;DN51770_c0_g1;DN62156_c0_g1;DN60260_c0_g3;DN48583_c0_g1;DN25603_c0_g2;DN54209_c0_g1;DN54494_c1_g1;DN52723_c0_g1;DN364_c0_g1;DN78016_c0_g1;DN33157_c0_g1;DN45373_c0_g1;DN56639_c0_g1;DN5536_c0_g1;DN85851_c0_g1;DN56353_c0_g1;DN35680_c0_g2;DN44942_c1_g5;DN57976_c0_g1;DN37064_c0_g1;DN28339_c0_g1;DN63651_c0_g2;DN89222_c0_g1;DN80072_c0_g1;DN62327_c1_g9;DN58663_c0_g1;DN72436_c0_g1;DN14835_c…
NITY_DN61211_c3_g1;DN44461_c0_g2;DN53125_c0_g1;DN15830_c0_g1;DN82378_c0_g1;DN29509_c0_g1;DN40154_c0_g1;DN65849_c0_g1;DN56883_c2_g4;DN38607_c0_g2;DN51431_c0_g1;DN90887_c0_g1;DN26664_c0_g2;DN13626_c0_g1;DN70478_c0_g2;DN27778_c0_g2;DN1485_c0_g1;DN56859_c3_g3;DN65316_c0_g1;DN35054_c0_g1;DN36096_c0_g1;DN14243_c0_g1;DN87195_c0_g1;DN35051_c0_g1;DN39488_c0_g2;DN64434_c3_g1;DN44635_c0_g3;DN69359_c0_g1;DN7…
ITY_DN28370_c0_g1;DN89583_c0_g1;DN14022_c0_g1;DN49103_c0_g1;DN30313_c0_g2;DN88551_c0_g1;DN39106_c0_g1;DN46918_c0_g3;DN14328_c0_g1;DN36925_c0_g2;DN82322_c0_g1;DN81617_c0_g1;DN29945_c1_g1;DN78876_c0_g1;DN53498_c0_g1;DN52825_c0_g1;DN87382_c0_g1;DN39879_c0_g1;DN1749_c0_g1;DN40537_c0_g1;DN61211_c3_g3;DN66614_c0_g1;DN58822_c0_g1;DN30873_c0_g1;DN41185_c0_g3;DN69627_c0_g1;DN40001_c0_g1;DN32343_c0_g1;DN46…
organelle	18688	DN45932_c0_g1;DN80131_c0_g1;DN6741_c0_g1;DN79104_c0_g1;DN63376_c0_g3;DN89184_c0_g1;DN86274_c0_g1;DN46013_c0_g2;DN71518_c0_g1;DN80443_c0_g1;DN62307_c0_g2;DN64122_c1_g2;DN33910_c0_g1;DN12660_c0_g1;DN60718_c1_g11;DN76311_c0_g1;DN71552_c0_g1;DN51811_c0_g1;DN75365_c0_g1;DN87526_c0_g1;DN59209_c0_g3;DN60767_c0_g2;DN66101_c0_g1;DN59256_c0_g4;DN34970_c0_g1;DN91164_c0_g1;DN64590_c3_g5;DN1322_c0_g2;DN48857_…
_DN67526_c0_g1;DN9187_c0_g1;DN76248_c0_g1;DN52958_c0_g1;DN85488_c0_g1;DN74956_c0_g1;DN87720_c0_g1;DN55006_c0_g2;DN68075_c0_g1;DN63236_c1_g1;DN78514_c0_g1;DN59849_c0_g2;DN47339_c0_g1;DN50282_c0_g2;DN40039_c0_g2;DN58229_c0_g2;DN52735_c5_g1;DN74173_c0_g1;DN64223_c0_g9;DN49699_c0_g1;DN77166_c0_g1;DN15219_c0_g1;DN72548_c0_g1;DN62105_c0_g1;DN26729_c0_g1;DN74405_c0_g1;DN37019_c0_g1;DN72234_c0_g1;DN87429…
RINITY_DN26704_c0_g1;DN60050_c0_g6;DN51972_c1_g1;DN40261_c0_g1;DN59005_c1_g4;DN20363_c0_g1;DN54671_c0_g1;DN24529_c0_g1;DN84900_c0_g1;DN29084_c0_g1;DN58617_c0_g1;DN35989_c1_g3;DN59972_c0_g5;DN84211_c0_g1;DN71533_c0_g1;DN44100_c0_g1;DN60106_c0_g1;DN49718_c1_g2;DN45707_c0_g1;DN79150_c0_g1;DN60195_c2_g1;DN52886_c0_g1;DN89375_c0_g1;DN47122_c0_g1;DN41386_c0_g1;DN21488_c1_g1;DN36833_c0_g1;DN81158_c0_g1;…
_g1;DN78949_c0_g1;DN44490_c0_g3;DN76192_c0_g1;DN50100_c0_g5;DN64550_c0_g6;DN75162_c0_g1;DN50119_c0_g1;DN24219_c0_g1;DN55717_c0_g2;DN57589_c1_g1;DN57186_c0_g1;DN72724_c0_g1;DN2503_c0_g1;DN42534_c0_g1;DN55301_c0_g4;DN85381_c0_g1;DN66574_c0_g1;DN25592_c0_g2;DN79299_c0_g1;DN58954_c0_g1;DN85896_c0_g1;DN37932_c0_g1;DN11524_c0_g1;DN59827_c1_g9;DN37887_c0_g1;DN87593_c0_g1;DN49550_c0_g1;DN50742_c0_g1;DN99…
g1;DN64371_c1_g6;DN81309_c0_g1;DN38741_c0_g1;DN46707_c0_g2;DN75583_c0_g1;DN41671_c0_g1;DN36257_c0_g1;DN47593_c0_g3;DN68795_c0_g1;DN73852_c0_g1;DN49519_c5_g1;DN51761_c0_g1;DN85353_c0_g1;DN51923_c0_g1;DN32436_c0_g1;DN29948_c0_g1;DN45686_c0_g1;DN35454_c0_g2;DN30174_c0_g1;DN57194_c0_g1;DN21185_c0_g1;DN50620_c0_g1;DN55577_c0_g1;DN49915_c0_g1;DN64083_c1_g1;DN56528_c0_g5;DN23584_c0_g1;DN39333_c0_g1;DN45…
DN54340_c0_g1;DN80020_c0_g1;DN16748_c0_g1;DN15696_c0_g1;DN13626_c0_g1;DN29509_c0_g1;DN16457_c0_g1;DN82201_c0_g1;DN73739_c0_g1;DN38706_c0_g1;DN51431_c0_g1;DN77744_c0_g1;DN44159_c0_g1;DN76865_c0_g1;DN81036_c0_g1;DN68342_c0_g1;DN88054_c0_g1;DN75944_c0_g1;DN44461_c0_g2;DN9227_c0_g2;DN76883_c0_g1;DN88615_c0_g1;DN83025_c0_g1;DN11055_c0_g1;DN14294_c0_g1;DN28190_c0_g1;DN79805_c0_g1;DN61878_c0_g1;DN57373_…
_DN64600_c1_g7;DN38664_c0_g2;DN10558_c0_g1;DN78509_c0_g1;DN82443_c0_g1;DN24600_c0_g1;DN6151_c0_g1;DN60405_c0_g3;DN64843_c3_g3;DN35087_c0_g1;DN61336_c1_g3;DN79194_c0_g1;DN87749_c0_g1;DN38883_c0_g1;DN47944_c0_g1;DN18012_c0_g2;DN2703_c0_g1;DN57896_c0_g1;DN62726_c0_g3;DN72806_c0_g1;DN28068_c0_g1;DN23868_c0_g1;DN43291_c2_g1;DN64142_c1_g3;DN41971_c0_g2;DN56929_c0_g2;DN33836_c0_g1;DN58051_c1_g1;DN42001_…
g1;DN53174_c0_g4;DN17962_c0_g1;DN63715_c1_g17;DN61331_c1_g2;DN17504_c0_g2;DN62882_c1_g2;DN88725_c0_g1;DN49751_c0_g1;DN72435_c0_g1;DN34251_c0_g2;DN69080_c0_g1;DN60921_c0_g3;DN73443_c0_g1;DN56465_c0_g1;DN6421_c0_g1;DN49752_c0_g4;DN77858_c0_g1;DN91396_c0_g1;DN22081_c0_g1;DN33759_c0_g2;DN34442_c0_g1;DN39685_c0_g1;DN47506_c0_g2;DN37748_c0_g1;DN85614_c0_g1;DN37115_c0_g1;DN39655_c0_g1;DN80223_c0_g1;DN82…
DN61395_c1_g2;DN33898_c0_g1;DN42311_c0_g1;DN59376_c0_g2;DN84017_c0_g1;DN39416_c0_g2;DN84933_c0_g1;DN88632_c0_g1;DN61569_c0_g2;DN51525_c0_g1;DN14726_c0_g1;DN73878_c0_g1;DN51937_c0_g1;DN14223_c0_g1;DN24978_c0_g2;DN36517_c0_g1;DN62514_c1_g1;DN67589_c0_g1;DN64131_c0_g4;DN68465_c0_g1;DN50400_c0_g1;DN44006_c0_g3;DN62365_c0_g8;DN64273_c1_g3;DN31222_c0_g1;DN15524_c0_g1;DN46146_c0_g1;DN86971_c0_g1;DN64373…
;DN67540_c0_g1;DN44323_c0_g1;DN89942_c0_g1;DN12291_c0_g1;DN9473_c0_g1;DN994_c0_g1;DN25856_c0_g1;DN53343_c0_g3;DN82515_c0_g1;DN84655_c0_g1;DN7391_c0_g1;DN57738_c0_g1;DN49047_c1_g2;DN65666_c0_g1;DN65241_c0_g1;DN17560_c0_g1;DN59719_c1_g2;DN55106_c2_g5;DN36810_c0_g1;DN83705_c0_g1;DN84370_c0_g1;DN12022_c0_g1;DN62157_c0_g3;DN56300_c0_g1;DN55346_c0_g1;DN75618_c0_g1;DN63756_c0_g2;DN88909_c0_g1;DN9261_c0_…
48_c0_g1;DN88189_c0_g1;DN40184_c0_g2;DN56907_c0_g1;DN64773_c0_g2;DN44681_c0_g1;DN41604_c0_g1;DN87498_c0_g1;DN55557_c0_g2;DN19811_c0_g2;DN27186_c0_g1;DN46964_c1_g1;DN50025_c1_g1;DN62553_c0_g1;DN19605_c0_g2;DN79233_c0_g1;DN38108_c0_g1;DN13290_c0_g1;DN67559_c0_g1;DN73228_c0_g2;DN62474_c1_g1;DN57850_c2_g1;DN61610_c0_g1;DN54367_c0_g1;DN55408_c0_g3;DN32035_c0_g1;DN55199_c0_g1;DN80490_c0_g1;DN46056_c0_g…
_DN41277_c0_g1;DN81924_c0_g1;DN80671_c0_g1;DN61635_c0_g4;DN64728_c0_g5;DN83378_c0_g1;DN77534_c0_g1;DN60121_c1_g1;DN87135_c0_g1;DN74125_c0_g1;DN87959_c0_g1;DN13173_c1_g1;DN86617_c0_g1;DN46741_c0_g1;DN9039_c0_g1;DN40278_c0_g1;DN64737_c3_g5;DN67052_c0_g1;DN30156_c0_g1;DN66222_c0_g1;DN69783_c0_g1;DN27015_c0_g1;DN18538_c0_g1;DN64318_c0_g8;DN38579_c0_g2;DN50862_c0_g1;DN28781_c0_g1;DN53994_c0_g1;DN62175…
ITY_DN52603_c0_g1;DN61984_c0_g2;DN64290_c0_g12;DN79011_c0_g1;DN51953_c0_g1;DN45687_c1_g1;DN54294_c1_g5;DN57140_c0_g1;DN79623_c0_g1;DN29321_c0_g1;DN52668_c0_g1;DN43674_c0_g1;DN79635_c0_g1;DN56830_c0_g1;DN63963_c0_g2;DN62521_c2_g2;DN49421_c0_g2;DN70816_c0_g1;DN46460_c0_g1;DN45818_c0_g1;DN31759_c0_g1;DN8863_c0_g1;DN82471_c0_g1;DN48144_c0_g3;DN48751_c0_g1;DN41176_c0_g3;DN45407_c0_g1;DN14250_c0_g1;DN8…
extracellular matrix part	3	DN68072_c0_g1;DN13553_c0_g1;DN78651_c0_g1
extracellular region part	72	DN33317_c0_g1;DN61121_c0_g4;DN33439_c0_g1;DN33012_c0_g2;DN83562_c0_g1;DN47428_c0_g4;DN76651_c0_g1;DN55536_c0_g3;DN70685_c0_g1;DN46719_c0_g2;DN45775_c0_g1;DN75553_c0_g1;DN77755_c0_g1;DN45775_c1_g2;DN55536_c0_g1;DN11816_c0_g1;DN34371_c0_g1;DN87571_c0_g1;DN63591_c0_g4;DN45775_c1_g1;DN11736_c0_g1;DN38168_c0_g2;DN49871_c0_g1;DN91097_c0_g1;DN59215_c0_g2;DN79647_c0_g1;DN63591_c0_g2;DN68883_c0_g1;DN27217…
organelle part	8729	DN62157_c0_g2;DN18562_c0_g2;DN59096_c0_g2;DN39571_c0_g1;DN59397_c0_g1;DN57735_c0_g1;DN59931_c1_g2;DN57019_c0_g1;DN40336_c0_g1;DN63236_c1_g2;DN64149_c0_g1;DN80132_c0_g1;DN17276_c0_g1;DN59344_c1_g2;DN37930_c0_g1;DN42500_c0_g1;DN61788_c1_g1;DN59703_c1_g1;DN60749_c1_g2;DN59331_c0_g2;DN21021_c0_g1;DN81111_c0_g1;DN62372_c0_g1;DN64295_c0_g5;DN7029_c0_g1;DN53452_c1_g6;DN34247_c0_g1;DN28861_c0_g1;DN75469_…
0_g1;DN91499_c0_g1;DN26074_c0_g1;DN34099_c0_g1;DN89316_c0_g1;DN25764_c0_g2;DN28465_c0_g1;DN53007_c0_g1;DN70400_c0_g1;DN47173_c0_g1;DN58825_c0_g1;DN8097_c1_g1;DN52051_c0_g1;DN58229_c0_g1;DN59931_c1_g3;DN56623_c0_g2;DN33412_c0_g1;DN42112_c0_g2;DN56402_c0_g5;DN87296_c0_g1;DN73653_c0_g1;DN66575_c0_g1;DN11767_c0_g1;DN57163_c1_g1;DN27399_c0_g1;DN72877_c0_g1;DN3844_c0_g1;DN72783_c0_g1;DN58619_c0_g4;DN81…
ITY_DN50769_c0_g1;DN62794_c2_g1;DN31715_c0_g1;DN33868_c0_g1;DN75429_c0_g1;DN46183_c0_g3;DN7398_c0_g1;DN61608_c1_g3;DN54955_c0_g1;DN66641_c0_g1;DN5177_c0_g1;DN90371_c0_g1;DN54258_c0_g2;DN72919_c0_g1;DN74632_c0_g1;DN33453_c0_g1;DN84860_c0_g1;DN63479_c0_g4;DN88901_c0_g1;DN35402_c0_g1;DN50706_c2_g2;DN75032_c0_g1;DN60677_c0_g1;DN63348_c0_g6;DN78728_c0_g1;DN75603_c0_g1;DN61052_c0_g2;DN6117_c0_g1;DN3433…
9_c0_g1;DN81556_c0_g1;DN41962_c0_g1;DN60628_c0_g1;DN45205_c0_g2;DN29878_c0_g2;DN50078_c0_g1;DN51517_c0_g1;DN27364_c0_g2;DN87597_c0_g1;DN8285_c0_g1;DN31787_c0_g3;DN18874_c0_g1;DN40629_c0_g1;DN52634_c0_g1;DN63029_c1_g3;DN53263_c0_g6;DN72657_c0_g1;DN53263_c0_g1;DN57231_c3_g1;DN85057_c0_g1;DN69995_c0_g1;DN62363_c1_g1;DN90078_c0_g1;DN49189_c0_g1;DN83269_c0_g1;DN62733_c0_g4;DN13131_c0_g1;DN18724_c0_g1;…
;DN88598_c0_g1;DN74988_c0_g1;DN53756_c0_g1;DN14154_c0_g1;DN60609_c0_g1;DN64056_c1_g1;DN32539_c1_g1;DN48421_c0_g3;DN60348_c0_g1;DN62588_c0_g3;DN61941_c0_g2;DN64077_c2_g2;DN57134_c0_g2;DN29878_c0_g1;DN35486_c0_g1;DN54440_c0_g2;DN46644_c0_g1;DN62223_c0_g1;DN25714_c0_g1;DN19046_c0_g1;DN27118_c0_g1;DN74523_c0_g1;DN41078_c0_g2;DN17607_c0_g1;DN51929_c0_g2;DN47116_c0_g1;DN54282_c0_g2;DN59343_c0_g2;DN2152…
1;DN76899_c0_g1;DN39881_c1_g1;DN51582_c0_g3;DN62684_c0_g3;DN4915_c0_g1;DN86635_c0_g1;DN12030_c0_g1;DN39847_c0_g1;DN9634_c0_g1;DN46842_c0_g1;DN19576_c0_g1;DN11285_c0_g1;DN54879_c0_g3;DN62441_c0_g3;DN52689_c0_g1;DN50990_c0_g4;DN60954_c0_g1;DN59966_c0_g2;DN606_c0_g1;DN16724_c0_g1;DN31173_c0_g1;DN60371_c0_g1;DN53237_c0_g2;DN68382_c0_g1;DN57909_c1_g1;DN65478_c0_g1;DN29843_c0_g1;DN57565_c0_g2;DN38427_c…
virion part	163	DN74031_c0_g1;DN63791_c0_g2;DN56540_c1_g1;DN87360_c0_g1;DN62828_c0_g6;DN20931_c0_g2;DN54927_c0_g1;DN60672_c0_g2;DN7312_c0_g1;DN63037_c0_g1;DN46195_c0_g1;DN85274_c0_g1;DN900_c0_g1;DN42631_c0_g3;DN44475_c0_g1;DN64552_c1_g1;DN43835_c1_g2;DN69468_c0_g1;DN71338_c0_g1;DN83814_c0_g1;DN24735_c0_g1;DN59362_c0_g1;DN17866_c0_g1;DN62027_c1_g2;DN38247_c0_g1;DN15320_c0_g1;DN61602_c0_g2;DN4915_c0_g1;DN22608_c0_…
membrane part	7069	DN77842_c0_g1;DN50613_c0_g2;DN57688_c0_g1;DN62655_c1_g1;DN53729_c0_g1;DN49140_c0_g1;DN64581_c0_g2;DN54840_c0_g1;DN86403_c0_g1;DN48323_c0_g1;DN53269_c0_g1;DN44387_c0_g2;DN90_c0_g1;DN44906_c0_g1;DN73827_c0_g1;DN65875_c0_g1;DN61184_c0_g2;DN77745_c0_g1;DN56798_c1_g1;DN85629_c0_g1;DN62397_c0_g3;DN64653_c1_g10;DN25687_c0_g1;DN46488_c1_g1;DN51665_c0_g1;DN40021_c0_g1;DN57420_c0_g2;DN43873_c0_g1;DN53860_c…
TY_DN63220_c1_g5;DN52555_c0_g1;DN19389_c0_g1;DN26973_c0_g1;DN74280_c0_g1;DN63835_c2_g1;DN48401_c0_g1;DN57456_c0_g1;DN76725_c0_g2;DN57914_c1_g1;DN28002_c1_g2;DN60280_c0_g2;DN61124_c1_g6;DN59123_c0_g1;DN26709_c0_g1;DN88877_c0_g1;DN60746_c0_g1;DN49725_c0_g2;DN54091_c0_g1;DN80806_c0_g1;DN61897_c0_g2;DN15707_c0_g1;DN86558_c0_g1;DN53570_c0_g1;DN50507_c1_g2;DN57247_c0_g3;DN64899_c5_g6;DN69734_c0_g1;DN83…
TY_DN64384_c0_g1;DN47891_c0_g1;DN34256_c0_g1;DN65162_c0_g1;DN58396_c0_g1;DN49178_c0_g1;DN61568_c0_g1;DN89519_c0_g1;DN40079_c0_g1;DN60235_c2_g3;DN64215_c1_g14;DN88275_c0_g1;DN91344_c0_g1;DN77472_c0_g1;DN81721_c0_g1;DN4596_c0_g2;DN50596_c0_g1;DN58899_c1_g1;DN59103_c1_g2;DN63815_c0_g2;DN18220_c0_g1;DN84793_c0_g2;DN60680_c0_g2;DN29126_c0_g1;DN79590_c0_g1;DN61124_c1_g4;DN53414_c0_g2;DN52746_c0_g1;DN75…
0_g2;DN45060_c0_g1;DN40629_c0_g1;DN82430_c0_g1;DN81711_c0_g1;DN72657_c0_g1;DN71659_c0_g1;DN18154_c0_g1;DN52478_c0_g1;DN25731_c0_g1;DN82944_c0_g1;DN20023_c0_g1;DN89858_c0_g1;DN51517_c0_g1;DN29878_c0_g2;DN8857_c0_g1;DN36493_c0_g2;DN49535_c0_g1;DN50078_c0_g1;DN45205_c0_g2;DN41829_c0_g1;DN55348_c0_g1;DN3217_c0_g1;DN87597_c0_g1;DN43835_c1_g1;DN8285_c0_g1;DN64516_c0_g6;DN27364_c0_g2;DN49875_c0_g2;DN235…
Y_DN68132_c0_g1;DN58765_c0_g3;DN55921_c0_g2;DN83609_c0_g1;DN76295_c0_g1;DN4011_c0_g1;DN79277_c0_g1;DN64644_c0_g1;DN42027_c0_g1;DN52510_c0_g1;DN36190_c0_g1;DN30636_c0_g1;DN62127_c0_g1;DN29304_c0_g1;DN83779_c0_g1;DN25429_c0_g1;DN7933_c0_g1;DN29837_c0_g1;DN53398_c0_g1;DN77400_c0_g1;DN82194_c0_g1;DN68183_c0_g1;DN21624_c0_g1;DN3268_c0_g1;DN65376_c0_g1;DN56743_c0_g1;DN66265_c0_g1;DN51043_c0_g1;DN38766_…
cell part	23604	DN49260_c0_g2;DN62791_c0_g1;DN39507_c0_g1;DN29127_c0_g2;DN64794_c2_g2;DN83322_c0_g1;DN54684_c0_g1;DN62256_c0_g1;DN37939_c0_g2;DN61520_c0_g1;DN12911_c0_g2;DN80421_c0_g1;DN47645_c0_g1;DN81301_c0_g1;DN13147_c0_g1;DN56734_c0_g3;DN88885_c0_g1;DN55385_c1_g4;DN51316_c0_g1;DN48925_c0_g2;DN46553_c0_g1;DN24591_c0_g2;DN7618_c0_g1;DN41964_c0_g1;DN2141_c0_g1;DN39922_c0_g1;DN60455_c0_g1;DN19373_c0_g1;DN44502_c…
1;DN34317_c0_g1;DN16226_c0_g2;DN3726_c0_g1;DN18514_c0_g1;DN25677_c0_g2;DN55218_c0_g2;DN83151_c0_g1;DN63480_c2_g1;DN39810_c0_g1;DN33765_c0_g2;DN61053_c0_g4;DN64290_c0_g14;DN45993_c0_g2;DN19829_c0_g1;DN80316_c0_g1;DN68110_c0_g1;DN52013_c0_g11;DN85026_c0_g1;DN54510_c0_g2;DN34133_c0_g2;DN29799_c0_g1;DN65926_c0_g1;DN61795_c2_g2;DN64030_c0_g2;DN18392_c0_g2;DN69140_c0_g1;DN47019_c0_g1;DN86500_c0_g1;DN90…
INITY_DN60389_c0_g1;DN50951_c0_g1;DN61864_c0_g2;DN38849_c0_g1;DN49444_c0_g1;DN74603_c0_g1;DN53990_c0_g1;DN67373_c0_g1;DN34019_c0_g2;DN87342_c0_g1;DN18223_c0_g1;DN74942_c0_g1;DN53629_c0_g1;DN80544_c0_g1;DN62097_c0_g1;DN36822_c0_g1;DN75671_c0_g1;DN54695_c1_g1;DN40040_c0_g1;DN87189_c0_g1;DN57459_c2_g2;DN46965_c0_g2;DN68825_c0_g1;DN33715_c0_g2;DN10912_c0_g1;DN62404_c0_g5;DN49627_c0_g2;DN50272_c0_g1;D…
N37379_c0_g1;DN89372_c0_g1;DN17754_c0_g1;DN67161_c0_g1;DN41965_c0_g2;DN36492_c0_g1;DN50808_c0_g1;DN79812_c0_g1;DN56738_c2_g1;DN10318_c0_g1;DN56932_c3_g7;DN61114_c0_g2;DN15977_c0_g2;DN54308_c1_g3;DN36743_c0_g1;DN14411_c0_g1;DN85396_c0_g1;DN25956_c0_g1;DN82933_c0_g1;DN62553_c1_g8;DN7768_c0_g1;DN2822_c0_g2;DN57975_c0_g2;DN82845_c0_g1;DN62727_c0_g1;DN65601_c0_g1;DN83870_c0_g1;DN13026_c0_g1;DN30960_c0…
c0_g2;DN9860_c0_g1;DN60809_c0_g1;DN55445_c0_g2;DN30067_c0_g2;DN67070_c0_g1;DN72891_c0_g1;DN43561_c0_g1;DN48323_c0_g1;DN64581_c0_g2;DN53729_c0_g1;DN64653_c1_g10;DN18761_c0_g2;DN32037_c0_g1;DN51924_c0_g1;DN61448_c0_g3;DN30395_c0_g1;DN31204_c0_g1;DN50373_c0_g4;DN57572_c0_g2;DN56188_c0_g1;DN15207_c0_g1;DN56389_c0_g3;DN77938_c0_g1;DN41808_c0_g2;DN22883_c0_g2;DN43460_c1_g1;DN72496_c0_g1;DN58760_c0_g1;D…
_DN54120_c0_g1;DN58619_c0_g6;DN59928_c0_g2;DN28478_c0_g1;DN62414_c0_g8;DN27264_c0_g2;DN28271_c0_g1;DN7345_c1_g1;DN46488_c1_g2;DN80003_c0_g1;DN49445_c0_g1;DN45632_c0_g3;DN51834_c0_g1;DN63409_c1_g1;DN32828_c0_g1;DN2588_c0_g1;DN53156_c3_g7;DN84788_c0_g1;DN8701_c0_g1;DN84417_c0_g1;DN12291_c0_g2;DN37063_c0_g2;DN48584_c0_g1;DN88692_c0_g1;DN15001_c0_g1;DN59109_c0_g1;DN45823_c0_g2;DN52399_c2_g3;DN2755_c0…
;DN37590_c0_g1;DN56292_c0_g1;DN64850_c1_g2;DN22712_c0_g1;DN14159_c0_g1;DN85791_c0_g1;DN67332_c0_g1;DN59975_c2_g1;DN48300_c2_g1;DN71269_c0_g1;DN64360_c0_g1;DN23769_c0_g2;DN59518_c1_g1;DN79898_c0_g1;DN77502_c0_g1;DN44672_c0_g1;DN55853_c0_g1;DN36759_c1_g1;DN49132_c0_g1;DN41060_c0_g1;DN7_c0_g1;DN74630_c0_g1;DN67532_c0_g1;DN56000_c0_g1;DN62456_c1_g5;DN55030_c0_g1;DN28935_c0_g2;DN72243_c0_g1;DN67480_c0…
_DN57135_c0_g1;DN61257_c0_g1;DN90323_c0_g1;DN45706_c1_g1;DN60300_c0_g1;DN59562_c0_g1;DN74809_c0_g1;DN28797_c0_g1;DN76017_c0_g1;DN76020_c0_g1;DN82782_c0_g1;DN75867_c0_g1;DN52045_c0_g1;DN62175_c1_g2;DN27761_c0_g1;DN33308_c0_g1;DN27244_c0_g1;DN25836_c0_g1;DN33647_c1_g1;DN84243_c0_g1;DN30231_c0_g1;DN62066_c0_g1;DN35778_c0_g2;DN44305_c0_g1;DN4372_c0_g1;DN62927_c0_g1;DN29716_c0_g2;DN60509_c0_g1;DN22901…
c1_g1;DN63767_c0_g1;DN42802_c0_g1;DN84384_c0_g1;DN41821_c0_g1;DN62010_c0_g2;DN54879_c0_g4;DN1837_c0_g1;DN26765_c0_g1;DN85869_c0_g1;DN55400_c0_g1;DN1571_c0_g1;DN60718_c1_g5;DN77335_c0_g1;DN87750_c0_g1;DN60575_c1_g1;DN67562_c0_g1;DN51925_c0_g1;DN13902_c0_g1;DN61478_c0_g1;DN55243_c0_g1;DN21035_c0_g1;DN36983_c0_g1;DN59005_c1_g3;DN42348_c0_g1;DN62186_c0_g3;DN68128_c0_g1;DN77745_c0_g1;DN73827_c0_g1;DN7…
TY_DN38080_c0_g2;DN37337_c0_g1;DN2977_c0_g1;DN54238_c0_g2;DN26581_c0_g1;DN61235_c0_g1;DN50525_c1_g2;DN60960_c0_g1;DN58112_c0_g5;DN44955_c1_g1;DN50604_c0_g2;DN54182_c0_g1;DN60509_c1_g1;DN46784_c0_g1;DN41263_c0_g1;DN24528_c0_g2;DN84502_c0_g1;DN70985_c0_g1;DN85550_c0_g1;DN59098_c0_g2;DN53389_c0_g2;DN40774_c0_g1;DN63923_c0_g3;DN36209_c0_g1;DN53008_c0_g1;DN55450_c0_g1;DN72076_c0_g1;DN62156_c0_g2;DN592…
N60393_c1_g1;DN41113_c0_g1;DN49304_c0_g1;DN34807_c0_g1;DN32824_c0_g1;DN70693_c0_g1;DN57373_c2_g5;DN75072_c0_g1;DN54857_c0_g2;DN55013_c0_g1;DN3936_c0_g1;DN61788_c2_g1;DN58479_c4_g1;DN47736_c0_g1;DN60244_c0_g1;DN50278_c2_g2;DN70912_c0_g1;DN63479_c0_g1;DN82708_c0_g1;DN36948_c0_g1;DN66871_c0_g1;DN54169_c0_g2;DN17862_c0_g1;DN83361_c0_g1;DN59975_c0_g1;DN84774_c0_g1;DN36654_c0_g4;DN52258_c0_g1;DN18075_c…
NITY_DN67828_c0_g1;DN42880_c1_g2;DN7966_c0_g1;DN74723_c0_g2;DN27959_c0_g1;DN39007_c0_g1;DN52070_c0_g1;DN13888_c0_g2;DN74449_c0_g1;DN17707_c0_g1;DN18687_c0_g1;DN64145_c0_g4;DN34142_c0_g2;DN62031_c0_g4;DN18585_c0_g1;DN60079_c0_g3;DN62293_c0_g5;DN75427_c0_g1;DN62691_c0_g2;DN52269_c0_g5;DN63007_c1_g3;DN26433_c0_g1;DN70700_c0_g1;DN62381_c0_g3;DN26445_c0_g1;DN34212_c1_g1;DN63587_c1_g1;DN64360_c0_g4;DN5…
_g1;DN72569_c0_g1;DN28854_c0_g1;DN62904_c1_g6;DN45009_c0_g1;DN34523_c0_g4;DN49694_c1_g1;DN70734_c0_g1;DN48122_c0_g1;DN59762_c0_g1;DN24425_c0_g1;DN54922_c0_g1;DN39723_c1_g2;DN34673_c0_g1;DN58294_c2_g1;DN57289_c0_g2;DN60686_c0_g1;DN52294_c0_g1;DN39908_c0_g1;DN1350_c0_g1;DN85561_c0_g1;DN61666_c0_g1;DN47165_c0_g1;DN55311_c2_g4;DN52303_c0_g1;DN8544_c0_g1;DN72949_c0_g1;DN32140_c0_g1;DN36010_c0_g1;DN809…
98_c0_g2;DN54946_c0_g1;DN53250_c0_g1;DN27968_c0_g2;DN50373_c0_g3;DN60335_c1_g3;DN50571_c0_g2;DN67253_c0_g1;DN68734_c0_g1;DN24513_c0_g1;DN82941_c0_g1;DN84271_c0_g1;DN45180_c0_g1;DN71633_c0_g1;DN63560_c1_g3;DN64702_c0_g1;DN53567_c0_g5;DN52980_c0_g1;DN47663_c0_g1;DN54683_c0_g1;DN36293_c0_g1;DN19408_c0_g2;DN13688_c0_g2;DN59918_c1_g1;DN91124_c0_g1;DN38689_c0_g2;DN88133_c0_g1;DN20166_c0_g1;DN53408_c0_g…
;DN83920_c0_g1;DN52723_c0_g1;DN90199_c0_g1;DN44942_c1_g5;DN56353_c0_g1;DN42788_c0_g1;DN26826_c0_g1;DN80072_c0_g1;DN62327_c1_g9;DN61897_c0_g1;DN58345_c0_g2;DN89222_c0_g1;DN64059_c0_g1;DN63066_c0_g1;DN79919_c0_g1;DN64460_c1_g9;DN72436_c0_g1;DN182_c0_g1;DN63130_c1_g1;DN58230_c3_g1;DN63629_c0_g4;DN58608_c0_g3;DN18322_c0_g2;DN18350_c0_g2;DN16740_c0_g1;DN7710_c0_g2;DN37201_c0_g1;DN76027_c0_g1;DN13526_c…
;DN77432_c0_g1;DN71834_c0_g1;DN66802_c0_g1;DN83184_c0_g1;DN84942_c0_g1;DN14510_c0_g2;DN62477_c1_g3;DN33895_c0_g1;DN7762_c0_g1;DN64600_c1_g12;DN77494_c0_g1;DN60929_c0_g1;DN51060_c1_g1;DN39305_c0_g2;DN63558_c0_g3;DN43424_c0_g1;DN57963_c0_g2;DN21026_c0_g1;DN66269_c0_g1;DN58350_c0_g3;DN59933_c0_g1;DN59555_c0_g1;DN66362_c0_g1;DN61105_c1_g9;DN32533_c1_g1;DN37157_c0_g1;DN763_c0_g1;DN6443_c0_g1;DN27608_c…

## Sheet:  molecular function
#GO_classify	Unigenes_gene_num	Unigenes_gene_ids
>molecular function
protein binding transcription factor activity	173	DN46376_c0_g1;DN12354_c0_g1;DN36154_c0_g1;DN16117_c0_g1;DN31220_c0_g1;DN19943_c0_g1;DN51263_c0_g1;DN46231_c0_g1;DN67314_c0_g1;DN63253_c1_g5;DN81786_c0_g1;DN14564_c0_g1;DN44681_c0_g1;DN44188_c0_g1;DN71099_c0_g1;DN59433_c0_g1;DN24207_c0_g1;DN87450_c0_g1;DN87498_c0_g1;DN40612_c0_g1;DN14564_c0_g2;DN70414_c0_g1;DN82145_c0_g1;DN59230_c0_g1;DN52691_c0_g1;DN62732_c0_g1;DN41378_c0_g1;DN62157_c0_g2;DN13691…
nucleic acid binding transcription factor activity	876	DN83704_c0_g1;DN36529_c0_g2;DN26889_c0_g1;DN19171_c0_g1;DN59001_c0_g3;DN48036_c0_g1;DN31220_c0_g1;DN9236_c0_g1;DN69432_c0_g1;DN56017_c0_g1;DN51154_c0_g2;DN60032_c1_g2;DN63605_c0_g3;DN85614_c0_g1;DN52042_c0_g1;DN48774_c0_g1;DN88385_c0_g1;DN6044_c0_g1;DN49586_c0_g2;DN18538_c0_g1;DN17553_c0_g1;DN59453_c0_g2;DN27117_c0_g1;DN50996_c0_g1;DN30483_c0_g1;DN90063_c0_g1;DN51685_c0_g1;DN51581_c0_g1;DN59453_c…
catalytic activity	25576	DN70835_c0_g1;DN60340_c1_g2;DN35861_c0_g1;DN51080_c0_g1;DN61937_c2_g7;DN21847_c0_g1;DN37905_c0_g2;DN62093_c0_g1;DN38402_c0_g1;DN60390_c0_g1;DN3279_c0_g1;DN61144_c0_g1;DN5975_c0_g1;DN66974_c0_g1;DN21898_c0_g1;DN45954_c0_g1;DN32674_c0_g2;DN25678_c0_g1;DN39825_c0_g1;DN57653_c1_g1;DN6371_c0_g2;DN67578_c0_g1;DN78754_c0_g1;DN17385_c0_g1;DN54702_c0_g2;DN15018_c0_g1;DN60080_c0_g3;DN67413_c0_g1;DN26795_c0…
1_c1_g1;DN29572_c0_g1;DN53989_c0_g6;DN79616_c0_g1;DN34860_c0_g1;DN22523_c0_g1;DN64913_c1_g1;DN58248_c0_g1;DN56208_c0_g1;DN68838_c0_g1;DN50717_c0_g1;DN70039_c0_g1;DN57500_c0_g1;DN4256_c0_g1;DN23340_c0_g1;DN27342_c0_g1;DN1335_c0_g1;DN18180_c1_g1;DN55606_c0_g1;DN15438_c0_g1;DN64418_c0_g4;DN90353_c0_g1;DN71356_c0_g1;DN61018_c0_g2;DN60610_c0_g1;DN62878_c0_g1;DN16587_c0_g1;DN66115_c0_g1;DN64802_c1_g3;D…
2_c1_g2;DN47566_c0_g1;DN63651_c0_g3;DN38144_c0_g1;DN12182_c0_g1;DN13935_c0_g1;DN64485_c2_g3;DN59436_c0_g2;DN49686_c0_g1;DN65551_c0_g1;DN84136_c0_g1;DN25490_c0_g1;DN60772_c0_g1;DN7602_c0_g2;DN64663_c0_g3;DN52775_c0_g2;DN75452_c0_g1;DN60330_c0_g1;DN54776_c1_g1;DN89908_c0_g1;DN64910_c2_g5;DN61892_c0_g1;DN64511_c0_g1;DN51460_c0_g1;DN65692_c0_g1;DN60172_c0_g1;DN51551_c0_g1;DN61637_c0_g1;DN50833_c0_g1;…
NITY_DN89401_c0_g1;DN6434_c0_g1;DN72120_c0_g1;DN60184_c0_g1;DN84203_c0_g1;DN50434_c0_g2;DN66744_c0_g1;DN70937_c0_g1;DN16902_c0_g1;DN57328_c0_g4;DN59265_c0_g11;DN71466_c0_g1;DN43493_c0_g2;DN60042_c2_g3;DN81242_c0_g1;DN54090_c0_g1;DN59219_c0_g1;DN40875_c0_g1;DN31336_c0_g1;DN37900_c0_g1;DN56565_c0_g2;DN36155_c1_g1;DN62272_c1_g3;DN57388_c2_g2;DN659_c1_g1;DN60070_c1_g3;DN63795_c1_g1;DN63132_c0_g2;DN49…
DN90584_c0_g1;DN18329_c0_g1;DN59265_c0_g9;DN71946_c0_g1;DN85710_c0_g1;DN54147_c0_g1;DN6468_c0_g1;DN63999_c0_g1;DN49106_c0_g1;DN7066_c0_g1;DN57935_c0_g1;DN65922_c0_g1;DN59233_c0_g1;DN81038_c0_g1;DN5921_c0_g1;DN53597_c0_g2;DN54870_c0_g1;DN57984_c0_g1;DN53667_c0_g4;DN61394_c2_g7;DN14819_c0_g1;DN45476_c0_g2;DN17537_c0_g1;DN69197_c0_g1;DN66250_c0_g1;DN90572_c0_g1;DN52882_c0_g1;DN57137_c0_g1;DN57362_c0…
DN20075_c0_g1;DN63150_c0_g7;DN62239_c0_g1;DN54626_c0_g1;DN84793_c0_g2;DN64896_c1_g3;DN3520_c0_g1;DN45415_c1_g1;DN70155_c0_g1;DN47955_c0_g2;DN90747_c0_g1;DN36520_c1_g1;DN64804_c2_g7;DN18222_c0_g1;DN75361_c0_g1;DN17664_c0_g2;DN23127_c0_g1;DN64275_c1_g3;DN5206_c0_g1;DN27421_c0_g3;DN64024_c0_g3;DN90382_c0_g1;DN69949_c0_g1;DN74227_c0_g1;DN60603_c1_g1;DN64432_c1_g4;DN63819_c0_g2;DN28468_c0_g1;DN73532_c…
_g4;DN35908_c0_g2;DN2896_c0_g1;DN64639_c2_g11;DN61534_c0_g1;DN59123_c0_g1;DN82125_c0_g1;DN47967_c0_g2;DN38663_c1_g1;DN54949_c0_g1;DN13554_c0_g1;DN37517_c0_g1;DN80435_c0_g1;DN44153_c0_g1;DN40923_c0_g2;DN57456_c0_g1;DN29759_c1_g1;DN69734_c0_g1;DN27747_c0_g1;DN65738_c0_g1;DN19281_c0_g2;DN50904_c1_g2;DN49725_c0_g2;DN53982_c0_g1;DN61813_c0_g1;DN63476_c0_g1;DN73709_c0_g1;DN43229_c0_g1;DN38242_c0_g1;DN2…
DN62875_c0_g1;DN4627_c0_g1;DN9430_c0_g1;DN78232_c0_g1;DN74318_c0_g1;DN14264_c0_g1;DN60365_c0_g2;DN17964_c1_g1;DN54667_c0_g1;DN7227_c0_g1;DN77943_c0_g1;DN85735_c0_g1;DN34882_c0_g1;DN16692_c0_g2;DN44196_c0_g1;DN76284_c0_g1;DN30321_c0_g1;DN6659_c0_g1;DN57778_c0_g1;DN38701_c0_g1;DN91246_c0_g1;DN50419_c0_g1;DN43176_c0_g1;DN56643_c0_g1;DN49701_c0_g1;DN59918_c0_g1;DN64668_c2_g1;DN42995_c0_g1;DN4622_c0_g…
NITY_DN59868_c0_g1;DN56327_c2_g4;DN71365_c0_g1;DN54712_c0_g1;DN55323_c1_g5;DN62835_c0_g2;DN72518_c0_g1;DN46502_c0_g1;DN69059_c0_g1;DN1781_c0_g1;DN64776_c2_g3;DN33577_c0_g1;DN45593_c0_g1;DN64180_c2_g2;DN56819_c0_g1;DN37781_c0_g1;DN43707_c0_g1;DN91007_c0_g1;DN54022_c0_g1;DN57750_c0_g1;DN89635_c0_g1;DN63311_c2_g3;DN58300_c3_g1;DN16988_c0_g1;DN918_c0_g1;DN60346_c1_g2;DN38322_c0_g1;DN55949_c0_g10;DN91…
1;DN63278_c2_g5;DN78538_c0_g1;DN88428_c0_g1;DN58931_c2_g4;DN66961_c0_g1;DN29406_c0_g1;DN60134_c0_g1;DN36088_c0_g2;DN25198_c0_g1;DN81016_c0_g1;DN81568_c0_g1;DN56116_c0_g3;DN67394_c0_g1;DN53467_c1_g1;DN55681_c0_g1;DN59068_c0_g1;DN48182_c0_g1;DN50968_c0_g1;DN61628_c0_g1;DN89996_c0_g1;DN27108_c0_g1;DN75245_c0_g1;DN31596_c0_g1;DN66710_c0_g1;DN88866_c0_g1;DN34091_c0_g1;DN91265_c0_g1;DN87937_c0_g1;DN561…
66369_c0_g1;DN28623_c0_g1;DN9788_c0_g1;DN6670_c0_g1;DN12987_c0_g2;DN28957_c0_g1;DN54023_c0_g1;DN85828_c0_g1;DN79154_c0_g1;DN19755_c0_g1;DN68190_c0_g1;DN47273_c0_g1;DN61472_c0_g1;DN62462_c1_g1;DN82838_c0_g1;DN13200_c0_g1;DN31309_c0_g1;DN53885_c0_g2;DN63278_c2_g3;DN37364_c0_g1;DN53820_c0_g2;DN55479_c4_g4;DN64224_c0_g9;DN63489_c1_g2;DN72849_c0_g1;DN74365_c0_g1;DN66681_c0_g1;DN50012_c0_g1;DN72506_c0_…
ITY_DN60151_c1_g1;DN77798_c0_g1;DN70485_c0_g1;DN47943_c0_g1;DN59747_c0_g2;DN89102_c0_g1;DN81737_c0_g1;DN58381_c0_g1;DN43822_c0_g1;DN64372_c1_g4;DN54848_c0_g2;DN37609_c0_g1;DN44131_c0_g2;DN51587_c0_g1;DN22634_c1_g1;DN56072_c2_g1;DN86982_c0_g1;DN50127_c0_g1;DN53216_c0_g2;DN35096_c0_g2;DN44862_c0_g1;DN78390_c0_g1;DN44625_c0_g1;DN11717_c0_g1;DN60189_c0_g5;DN55325_c0_g2;DN32787_c0_g1;DN78570_c0_g1;DN4…
509_c1_g1;DN86615_c0_g1;DN58432_c0_g1;DN48746_c0_g1;DN77726_c0_g1;DN14376_c0_g1;DN61512_c0_g4;DN48507_c0_g2;DN13323_c0_g1;DN71650_c0_g1;DN52572_c0_g1;DN40535_c0_g1;DN61591_c1_g4;DN63621_c1_g3;DN27641_c0_g1;DN7099_c0_g1;DN31235_c1_g1;DN35055_c0_g1;DN9219_c0_g1;DN85944_c0_g1;DN56025_c0_g1;DN81822_c0_g1;DN65897_c0_g1;DN44796_c0_g1;DN64317_c1_g5;DN50166_c0_g1;DN58194_c0_g1;DN63853_c0_g4;DN15403_c0_g1…
N50873_c0_g3;DN87651_c0_g1;DN15976_c0_g2;DN77440_c0_g1;DN62040_c0_g2;DN44266_c1_g1;DN64729_c1_g14;DN64987_c0_g1;DN64732_c4_g1;DN31484_c1_g1;DN61544_c0_g5;DN84915_c0_g1;DN79001_c0_g1;DN53964_c0_g1;DN62548_c1_g2;DN40796_c0_g2;DN23001_c0_g1;DN74917_c0_g1;DN60258_c0_g1;DN61563_c0_g2;DN52111_c0_g1;DN50640_c0_g1;DN3538_c0_g1;DN38340_c0_g1;DN46867_c0_g1;DN54834_c0_g1;DN88577_c0_g1;DN64159_c1_g4;DN57377_…
N82973_c0_g1;DN47587_c0_g2;DN5270_c0_g1;DN37825_c0_g1;DN37554_c1_g1;DN37641_c0_g2;DN57768_c0_g1;DN59504_c1_g2;DN52380_c0_g1;DN16244_c0_g1;DN71462_c0_g1;DN60723_c0_g2;DN622_c0_g2;DN49913_c1_g1;DN51215_c0_g1;DN23721_c0_g1;DN64780_c3_g6;DN37870_c0_g1;DN66612_c0_g1;DN37917_c0_g1;DN62352_c0_g3;DN18574_c0_g1;DN48032_c2_g1;DN219_c0_g1;DN56615_c0_g1;DN64078_c0_g4;DN60374_c0_g3;DN46668_c0_g1;DN62351_c0_g1…
N5513_c0_g2;DN52797_c0_g2;DN58949_c2_g2;DN56843_c0_g2;DN32043_c0_g2;DN1902_c0_g1;DN23967_c0_g1;DN55936_c5_g3;DN67568_c0_g1;DN61876_c0_g1;DN56781_c0_g3;DN61408_c2_g11;DN75232_c0_g1;DN44724_c0_g1;DN28019_c0_g1;DN52526_c0_g1;DN77911_c0_g1;DN47826_c0_g1;DN63198_c2_g3;DN63591_c0_g3;DN83615_c0_g1;DN55821_c0_g2;DN68558_c0_g1;DN38307_c0_g1;DN43151_c0_g1;DN89667_c0_g1;DN81450_c0_g1;DN16175_c0_g1;DN84106_c…
1;DN52985_c0_g1;DN38882_c0_g2;DN31103_c0_g1;DN56567_c0_g3;DN63198_c2_g1;DN63961_c0_g7;DN9036_c0_g1;DN44061_c0_g1;DN59849_c0_g1;DN63069_c0_g1;DN85546_c0_g1;DN2236_c0_g1;DN63150_c0_g1;DN63739_c0_g4;DN26498_c0_g2;DN30300_c0_g1;DN6519_c0_g1;DN24077_c0_g1;DN60282_c0_g2;DN39221_c0_g1;DN38589_c0_g2;DN61141_c0_g1;DN35862_c0_g2;DN88607_c0_g1;DN63517_c0_g1;DN62269_c0_g2;DN38669_c1_g2;DN61463_c1_g1;DN44168_…
NITY_DN53469_c0_g3;DN25403_c0_g1;DN76122_c0_g1;DN39365_c0_g2;DN53564_c0_g1;DN81711_c0_g1;DN64186_c0_g1;DN18154_c0_g1;DN54860_c0_g1;DN82269_c0_g1;DN38001_c0_g2;DN56918_c0_g1;DN54500_c0_g1;DN55310_c2_g1;DN14762_c0_g1;DN53518_c0_g2;DN42574_c0_g1;DN40629_c0_g1;DN52537_c0_g1;DN69182_c0_g1;DN30673_c0_g2;DN62634_c1_g2;DN81073_c0_g1;DN55128_c0_g1;DN64729_c1_g13;DN62107_c0_g6;DN27364_c0_g2;DN88434_c0_g1;D…
receptor activity	236	DN82738_c0_g1;DN50245_c0_g1;DN89651_c0_g1;DN12157_c0_g2;DN89700_c0_g1;DN62440_c1_g1;DN55746_c0_g1;DN54200_c0_g1;DN73828_c0_g1;DN38488_c0_g1;DN61101_c0_g3;DN50194_c1_g1;DN27210_c0_g1;DN63663_c0_g10;DN57092_c0_g1;DN51313_c0_g2;DN53601_c2_g2;DN53915_c0_g1;DN25666_c0_g1;DN64180_c2_g1;DN58447_c0_g2;DN69930_c0_g1;DN60496_c0_g1;DN64012_c0_g2;DN66117_c0_g1;DN46019_c0_g1;DN76081_c0_g1;DN15562_c0_g1;DN4928…
guanyl-nucleotide exchange factor activity	96	DN70861_c0_g1;DN793_c0_g1;DN64790_c0_g5;DN13858_c0_g1;DN17404_c0_g1;DN65339_c0_g1;DN34232_c0_g2;DN89420_c0_g1;DN27631_c0_g1;DN24039_c0_g1;DN41210_c0_g1;DN25677_c0_g3;DN63561_c0_g5;DN77433_c0_g1;DN42278_c0_g2;DN64790_c0_g6;DN64790_c0_g10;DN90078_c0_g1;DN63365_c1_g2;DN29196_c0_g1;DN18059_c0_g1;DN31614_c0_g1;DN40940_c0_g1;DN63972_c0_g1;DN35637_c0_g1;DN22660_c0_g1;DN56734_c0_g2;DN25677_c0_g2;DN64790_…
structural molecule activity	2816	DN58889_c0_g1;DN75088_c0_g1;DN16231_c0_g1;DN29294_c0_g1;DN46605_c1_g1;DN73201_c0_g1;DN62293_c0_g2;DN50750_c0_g1;DN55476_c1_g5;DN17692_c0_g1;DN59005_c0_g1;DN35792_c0_g1;DN8833_c0_g1;DN43890_c0_g2;DN54193_c1_g6;DN29421_c0_g2;DN48481_c0_g1;DN21322_c0_g1;DN42456_c1_g1;DN63743_c2_g2;DN56402_c1_g1;DN46104_c0_g1;DN89785_c0_g1;DN67611_c0_g1;DN35905_c0_g1;DN70679_c0_g1;DN90951_c0_g1;DN26392_c0_g1;DN18964_…
DN48845_c1_g1;DN29537_c0_g2;DN15211_c0_g1;DN59305_c1_g3;DN53042_c2_g2;DN59872_c0_g1;DN14508_c0_g1;DN26510_c0_g1;DN23080_c0_g1;DN41219_c0_g3;DN59700_c0_g4;DN63925_c0_g1;DN67856_c0_g1;DN76592_c0_g1;DN64351_c0_g6;DN6350_c0_g1;DN70680_c0_g1;DN31099_c1_g1;DN33189_c0_g1;DN40693_c0_g1;DN54130_c1_g4;DN58451_c0_g3;DN42100_c0_g1;DN54601_c0_g1;DN30872_c0_g2;DN62262_c0_g1;DN28986_c0_g1;DN25148_c0_g3;DN39513_…
transporter activity	3134	DN47448_c0_g1;DN22004_c0_g1;DN29387_c0_g1;DN59523_c1_g3;DN69663_c0_g1;DN48027_c0_g4;DN57722_c0_g1;DN47772_c1_g1;DN63264_c0_g1;DN63850_c0_g3;DN71311_c0_g1;DN36010_c0_g1;DN57112_c0_g1;DN27720_c0_g1;DN58885_c0_g2;DN37253_c0_g1;DN88173_c0_g1;DN60041_c0_g1;DN42439_c0_g1;DN35751_c1_g1;DN61651_c1_g4;DN27252_c0_g1;DN24425_c0_g1;DN58202_c0_g1;DN34171_c0_g1;DN50507_c1_g4;DN70097_c0_g1;DN88060_c0_g1;DN71085…
0_g1;DN61961_c0_g6;DN45639_c0_g1;DN45639_c0_g2;DN54443_c0_g1;DN24726_c0_g1;DN73786_c0_g1;DN73151_c0_g1;DN52264_c0_g2;DN39371_c0_g1;DN61117_c1_g1;DN64593_c1_g3;DN71804_c0_g1;DN64215_c1_g2;DN62930_c0_g1;DN47857_c0_g1;DN60205_c0_g1;DN73801_c0_g1;DN64534_c1_g5;DN57692_c0_g1;DN68134_c0_g1;DN71845_c0_g1;DN55534_c0_g3;DN67079_c0_g1;DN63460_c0_g2;DN53126_c0_g1;DN25293_c0_g1;DN90592_c0_g1;DN82997_c0_g1;DN…
TY_DN42293_c0_g1;DN3339_c0_g1;DN62242_c0_g3;DN31364_c0_g2;DN36351_c0_g1;DN79084_c0_g1;DN7435_c0_g1;DN61737_c1_g1;DN56049_c0_g1;DN3311_c0_g1;DN69134_c0_g1;DN57198_c0_g1;DN43810_c0_g1;DN66516_c0_g1;DN52789_c1_g1;DN69600_c0_g1;DN40677_c0_g1;DN61246_c0_g1;DN60453_c1_g1;DN57734_c1_g2;DN20280_c0_g1;DN62203_c0_g2;DN17492_c0_g1;DN25839_c0_g1;DN63449_c1_g1;DN68867_c0_g1;DN88952_c0_g1;DN61640_c0_g1;DN53891…
binding	22564	DN48006_c0_g2;DN39587_c0_g2;DN33526_c0_g1;DN49882_c4_g1;DN62328_c0_g1;DN58868_c0_g2;DN79809_c0_g1;DN91491_c0_g1;DN52965_c0_g1;DN25159_c1_g1;DN32063_c1_g1;DN63902_c0_g2;DN31489_c0_g1;DN54658_c0_g2;DN40185_c0_g1;DN61656_c0_g1;DN57620_c0_g6;DN82038_c0_g1;DN57947_c1_g13;DN64926_c6_g10;DN55135_c0_g1;DN58178_c0_g5;DN63932_c0_g1;DN43010_c0_g2;DN80433_c0_g1;DN30946_c0_g1;DN56247_c0_g2;DN2594_c0_g1;DN5169…
2_c1_g1;DN13675_c0_g1;DN60252_c0_g1;DN51786_c0_g1;DN50580_c0_g2;DN47591_c0_g1;DN63895_c0_g1;DN54301_c0_g1;DN46407_c0_g3;DN62613_c0_g3;DN79827_c0_g1;DN44019_c0_g1;DN58063_c0_g1;DN33507_c0_g1;DN83049_c0_g1;DN53372_c0_g1;DN17154_c0_g1;DN60241_c0_g1;DN64420_c1_g2;DN1851_c0_g1;DN64022_c0_g1;DN60951_c0_g2;DN55391_c0_g1;DN12776_c0_g1;DN4160_c0_g2;DN61240_c0_g2;DN58479_c4_g2;DN83433_c0_g1;DN63018_c0_g3;D…
5288_c0_g1;DN89700_c0_g1;DN55481_c0_g1;DN30295_c0_g1;DN47390_c0_g2;DN62278_c0_g1;DN64540_c1_g9;DN59010_c0_g1;DN41531_c0_g1;DN2949_c0_g2;DN6946_c0_g1;DN56171_c3_g2;DN52355_c0_g1;DN33439_c0_g1;DN26608_c0_g1;DN58960_c0_g3;DN59566_c0_g1;DN63344_c0_g1;DN74435_c0_g1;DN89920_c0_g1;DN35092_c0_g1;DN48497_c0_g4;DN48061_c0_g1;DN33662_c1_g1;DN63527_c1_g2;DN84765_c0_g1;DN62470_c1_g4;DN10762_c0_g1;DN73447_c0_g…
TY_DN51275_c1_g1;DN59592_c0_g1;DN36181_c0_g1;DN51258_c0_g1;DN70037_c0_g1;DN56584_c2_g1;DN14715_c0_g1;DN63368_c1_g1;DN76492_c0_g1;DN91499_c0_g1;DN64041_c0_g3;DN36760_c0_g2;DN42164_c1_g1;DN53819_c0_g1;DN56402_c0_g7;DN57666_c0_g1;DN49410_c0_g1;DN5791_c0_g1;DN45515_c0_g1;DN30041_c0_g1;DN62832_c0_g2;DN80584_c0_g1;DN59265_c0_g13;DN60155_c3_g3;DN61649_c0_g2;DN75175_c0_g1;DN74319_c0_g1;DN11149_c0_g2;DN62…
;DN64680_c1_g8;DN2990_c0_g1;DN53864_c0_g11;DN61473_c0_g1;DN84118_c0_g1;DN4680_c0_g1;DN33892_c0_g1;DN69457_c0_g1;DN64770_c2_g3;DN64769_c1_g2;DN55840_c0_g7;DN60897_c0_g7;DN47237_c0_g1;DN62259_c0_g1;DN64416_c0_g4;DN58358_c0_g1;DN91351_c0_g2;DN41644_c0_g1;DN55254_c0_g1;DN52920_c0_g1;DN63581_c0_g10;DN61096_c1_g1;DN49591_c0_g1;DN31375_c0_g3;DN60434_c2_g3;DN26509_c0_g2;DN38206_c0_g1;DN63941_c0_g1;DN6342…
_DN64388_c3_g1;DN57796_c0_g1;DN46596_c0_g1;DN51519_c0_g1;DN31787_c0_g2;DN38030_c0_g2;DN23941_c0_g2;DN34116_c0_g2;DN41904_c0_g1;DN63191_c0_g1;DN69533_c0_g1;DN10689_c0_g1;DN16559_c0_g1;DN66731_c0_g1;DN81546_c0_g1;DN83617_c0_g1;DN46322_c0_g1;DN51792_c0_g1;DN49113_c0_g1;DN73154_c0_g1;DN38779_c0_g1;DN89265_c0_g1;DN78738_c0_g1;DN59718_c0_g7;DN61273_c0_g2;DN36583_c0_g1;DN49586_c0_g1;DN73913_c0_g1;DN7292…
62013_c1_g6;DN54696_c0_g2;DN31542_c0_g1;DN59844_c0_g2;DN29991_c0_g1;DN41697_c0_g1;DN90674_c0_g1;DN90084_c0_g1;DN62120_c1_g1;DN59627_c1_g3;DN17242_c0_g1;DN26092_c0_g1;DN56591_c0_g1;DN54068_c0_g1;DN74221_c0_g1;DN62488_c1_g1;DN7988_c0_g1;DN77225_c0_g1;DN62474_c4_g5;DN14766_c0_g1;DN38356_c0_g1;DN39264_c0_g2;DN17153_c0_g1;DN87868_c0_g1;DN42768_c0_g1;DN60155_c3_g4;DN80860_c0_g1;DN61220_c0_g1;DN49275_c0…
;DN61242_c0_g3;DN82025_c0_g1;DN33970_c0_g1;DN64170_c0_g3;DN76558_c0_g1;DN52141_c0_g1;DN64800_c4_g1;DN30200_c0_g1;DN64399_c1_g3;DN63210_c1_g3;DN53524_c2_g4;DN33613_c0_g2;DN64400_c0_g1;DN81518_c0_g1;DN48664_c0_g1;DN45663_c0_g1;DN27468_c0_g1;DN53610_c0_g1;DN53228_c0_g2;DN57947_c1_g12;DN51158_c0_g1;DN80755_c0_g1;DN87029_c0_g1;DN27227_c0_g2;DN30642_c0_g1;DN60102_c1_g5;DN21206_c0_g1;DN30413_c0_g3;DN183…
NITY_DN58245_c0_g2;DN62319_c1_g1;DN41507_c0_g2;DN78166_c0_g1;DN62391_c0_g1;DN31082_c0_g1;DN43234_c0_g1;DN60324_c0_g1;DN61300_c0_g6;DN28636_c0_g1;DN43668_c0_g1;DN33990_c0_g1;DN71188_c0_g1;DN54987_c3_g1;DN27330_c0_g1;DN50738_c0_g2;DN3388_c0_g1;DN27745_c0_g1;DN24918_c0_g1;DN66723_c0_g1;DN50323_c0_g1;DN24928_c0_g1;DN85357_c0_g1;DN69096_c0_g1;DN61022_c1_g4;DN61328_c1_g2;DN80660_c0_g1;DN79841_c0_g1;DN3…
c0_g1;DN67202_c0_g1;DN51926_c0_g1;DN67978_c0_g1;DN70884_c0_g1;DN17145_c0_g1;DN9900_c0_g1;DN63686_c0_g1;DN63902_c0_g3;DN47230_c0_g1;DN64204_c1_g2;DN84798_c0_g1;DN64868_c3_g6;DN69301_c0_g1;DN48609_c0_g1;DN30666_c0_g1;DN63963_c0_g7;DN13016_c0_g1;DN61555_c1_g1;DN7910_c1_g1;DN74092_c0_g1;DN59120_c0_g2;DN30673_c0_g1;DN51907_c0_g1;DN61276_c0_g1;DN84044_c0_g1;DN63941_c1_g3;DN54282_c0_g1;DN55831_c0_g1;DN3…
1;DN47680_c0_g1;DN50369_c0_g1;DN56506_c0_g4;DN55450_c0_g2;DN40080_c0_g1;DN17196_c0_g1;DN60335_c1_g2;DN73134_c0_g1;DN69682_c0_g1;DN51520_c0_g3;DN63629_c0_g1;DN46082_c0_g1;DN60749_c0_g1;DN57563_c0_g2;DN51324_c1_g1;DN16170_c0_g1;DN23873_c0_g1;DN66224_c0_g1;DN64159_c1_g5;DN61077_c0_g3;DN70399_c0_g1;DN56021_c0_g1;DN61982_c0_g1;DN54685_c0_g1;DN33446_c0_g1;DN64728_c0_g2;DN48543_c0_g1;DN62828_c0_g1;DN923…
INITY_DN54019_c0_g1;DN74460_c0_g1;DN56241_c0_g2;DN58479_c2_g1;DN63392_c0_g5;DN68065_c0_g1;DN42634_c0_g1;DN78422_c0_g1;DN53161_c0_g4;DN69762_c0_g1;DN58652_c0_g2;DN59624_c0_g2;DN63707_c2_g3;DN30281_c0_g1;DN77422_c0_g1;DN62457_c0_g5;DN58912_c0_g1;DN19557_c1_g1;DN79440_c0_g1;DN48224_c0_g1;DN88580_c0_g1;DN80273_c0_g1;DN63267_c0_g2;DN84054_c0_g1;DN36048_c0_g2;DN62969_c0_g3;DN64410_c0_g1;DN64262_c1_g3;D…
N55904_c1_g2;DN57541_c0_g3;DN61642_c0_g1;DN72461_c0_g1;DN51355_c0_g3;DN77384_c0_g1;DN62523_c1_g1;DN69918_c0_g1;DN9516_c0_g1;DN87450_c0_g1;DN43458_c0_g1;DN52013_c0_g8;DN50296_c1_g1;DN56208_c1_g2;DN50706_c1_g1;DN42365_c0_g1;DN49514_c0_g1;DN59352_c1_g1;DN75997_c0_g1;DN43684_c0_g1;DN47347_c0_g3;DN49189_c0_g2;DN38314_c0_g1;DN41560_c0_g1;DN64944_c0_g1;DN62397_c0_g4;DN58364_c0_g4;DN59840_c1_g2;DN50264_c…
N76317_c0_g1;DN41637_c0_g1;DN12071_c0_g1;DN58276_c0_g2;DN88356_c0_g1;DN62567_c1_g1;DN74316_c0_g1;DN79381_c0_g1;DN79937_c0_g1;DN11565_c0_g1;DN74811_c0_g1;DN55626_c1_g1;DN53916_c0_g2;DN49776_c0_g1;DN51936_c0_g1;DN55451_c2_g2;DN55006_c0_g3;DN431_c0_g2;DN61006_c0_g1;DN15774_c0_g2;DN26573_c0_g1;DN45828_c0_g1;DN1776_c0_g1;DN52271_c0_g1;DN87879_c0_g1;DN91271_c0_g1;DN48717_c0_g1;DN60718_c1_g13;DN2665_c0_…
2_c0_g1;DN58479_c4_g1;DN70693_c0_g1;DN59937_c0_g1;DN57373_c2_g5;DN58789_c0_g2;DN51830_c0_g3;DN62188_c0_g5;DN59047_c1_g1;DN7374_c0_g1;DN78132_c0_g1;DN69195_c0_g1;DN43640_c0_g2;DN30546_c0_g2;DN64147_c0_g2;DN64152_c1_g1;DN47257_c0_g1;DN52258_c0_g1;DN3899_c0_g2;DN91648_c0_g1;DN20490_c0_g1;DN51568_c1_g1;DN4555_c0_g1;DN46851_c0_g3;DN85046_c0_g1;DN39602_c0_g1;DN54793_c1_g1;DN54199_c0_g1;DN35952_c0_g1;DN…
INITY_DN20268_c0_g1;DN82170_c0_g1;DN71557_c0_g1;DN88405_c0_g1;DN62688_c3_g5;DN449_c0_g2;DN59432_c1_g1;DN72216_c0_g1;DN63886_c0_g1;DN63871_c1_g4;DN61969_c1_g2;DN10410_c0_g1;DN62647_c1_g8;DN49012_c0_g1;DN29487_c0_g1;DN87843_c0_g1;DN56347_c1_g3;DN60975_c0_g1;DN51673_c1_g1;DN55054_c0_g1;DN84627_c0_g1;DN46520_c0_g1;DN46256_c0_g1;DN59446_c0_g1;DN84797_c0_g1;DN72293_c0_g1;DN76992_c0_g1;DN70724_c0_g1;DN4…
electron carrier activity	598	DN69734_c0_g1;DN49030_c1_g1;DN80667_c0_g1;DN89046_c0_g1;DN16724_c0_g1;DN63709_c1_g3;DN31736_c0_g2;DN63131_c2_g8;DN40827_c0_g1;DN55835_c0_g1;DN47025_c0_g1;DN62518_c0_g1;DN49639_c0_g2;DN44899_c0_g1;DN25472_c0_g1;DN81964_c0_g1;DN45526_c0_g1;DN47953_c0_g1;DN32238_c0_g1;DN81630_c0_g1;DN72823_c0_g1;DN50912_c1_g2;DN69858_c0_g1;DN39136_c0_g1;DN17191_c0_g1;DN91134_c0_g1;DN58634_c0_g1;DN36790_c0_g1;DN55740…
antioxidant activity	519	DN51300_c0_g1;DN58318_c1_g1;DN69712_c0_g1;DN45201_c0_g1;DN91093_c0_g1;DN67874_c0_g1;DN44274_c0_g1;DN10410_c0_g1;DN13107_c0_g1;DN41716_c0_g2;DN91254_c0_g1;DN71557_c0_g1;DN63502_c0_g1;DN33156_c0_g3;DN45670_c1_g2;DN41302_c0_g1;DN71717_c0_g1;DN38667_c0_g2;DN6285_c0_g1;DN83247_c0_g1;DN57575_c0_g2;DN62314_c0_g2;DN82020_c0_g1;DN64890_c2_g1;DN54090_c0_g1;DN1681_c0_g1;DN47099_c0_g1;DN52860_c0_g2;DN10730_c…
metallochaperone activity	28	DN49522_c0_g1;DN32525_c0_g1;DN54684_c0_g1;DN86635_c0_g1;DN16207_c0_g1;DN76179_c0_g1;DN18781_c0_g1;DN27542_c0_g2;DN83760_c0_g1;DN48565_c0_g1;DN70203_c0_g1;DN11863_c0_g1;DN77168_c0_g1;DN66043_c0_g1;DN28524_c0_g1;DN1224_c0_g1;DN84844_c0_g1;DN71846_c0_g1;DN68075_c0_g1;DN70080_c0_g1;DN1224_c1_g1;DN27542_c0_g1;DN70205_c0_g1;DN67408_c0_g1;DN64620_c0_g6;DN22873_c0_g1;DN62221_c0_g2;DN46423_c0_g1
enzyme regulator activity	565	DN58743_c1_g1;DN70739_c0_g1;DN51106_c0_g1;DN52033_c0_g1;DN36519_c0_g2;DN56386_c0_g2;DN53679_c0_g1;DN81661_c0_g1;DN57131_c0_g2;DN53156_c3_g4;DN57610_c0_g1;DN45114_c0_g1;DN83146_c0_g1;DN17619_c0_g1;DN2493_c0_g1;DN82892_c0_g1;DN71578_c0_g1;DN1375_c0_g1;DN46441_c0_g2;DN23747_c0_g1;DN77139_c0_g1;DN45009_c0_g1;DN55875_c0_g2;DN55123_c0_g1;DN85188_c0_g1;DN68364_c0_g1;DN43834_c0_g1;DN17307_c0_g1;DN60860_c…
protein tag	55	DN58555_c1_g9;DN54207_c2_g9;DN40603_c0_g1;DN51774_c1_g1;DN26908_c0_g2;DN54207_c2_g3;DN58555_c1_g4;DN37458_c0_g1;DN54207_c2_g6;DN24450_c0_g1;DN62590_c0_g5;DN54207_c2_g1;DN31026_c1_g1;DN54207_c2_g4;DN1751_c0_g1;DN57598_c0_g7;DN58633_c0_g1;DN58555_c1_g5;DN58555_c1_g3;DN58555_c1_g2;DN58555_c1_g1;DN81875_c0_g1;DN57598_c0_g5;DN18751_c0_g1;DN65832_c0_g1;DN25127_c0_g1;DN36679_c0_g1;DN54207_c2_g8;DN11686_…
translation regulator activity	18	DN74944_c0_g1;DN2915_c0_g1;DN77926_c0_g1;DN72341_c0_g1;DN32225_c0_g1;DN57440_c0_g1;DN83869_c0_g1;DN82519_c0_g1;DN77720_c0_g1;DN88336_c0_g1;DN87361_c0_g1;DN30313_c0_g2;DN26596_c0_g1;DN52708_c0_g1;DN32225_c1_g1;DN35594_c0_g1;DN69492_c0_g1;DN34163_c0_g1
nutrient reservoir activity	92	DN44936_c0_g1;DN60587_c0_g2;DN54643_c0_g1;DN77986_c0_g1;DN66197_c0_g1;DN41912_c0_g1;DN67918_c0_g1;DN68398_c0_g1;DN84337_c0_g1;DN62030_c0_g3;DN32583_c0_g1;DN62030_c0_g1;DN62605_c0_g3;DN90055_c0_g1;DN57744_c0_g1;DN50686_c0_g1;DN14314_c0_g1;DN67070_c0_g1;DN76886_c0_g1;DN60778_c0_g4;DN9900_c0_g2;DN75948_c0_g1;DN48067_c0_g2;DN43417_c0_g1;DN24957_c0_g1;DN34968_c0_g1;DN54497_c0_g3;DN84659_c0_g1;DN1717_c…
molecular transducer activity	470	DN32898_c0_g1;DN52995_c0_g1;DN83397_c0_g1;DN13825_c0_g1;DN24137_c0_g2;DN52458_c0_g1;DN76184_c0_g1;DN45879_c0_g1;DN73083_c0_g2;DN40220_c0_g1;DN80996_c0_g1;DN60248_c0_g1;DN57109_c0_g1;DN47496_c1_g2;DN60977_c0_g3;DN57027_c1_g4;DN63184_c0_g3;DN44663_c0_g1;DN33901_c0_g1;DN48473_c1_g1;DN84895_c0_g1;DN56467_c1_g2;DN28213_c0_g2;DN50736_c0_g1;DN43691_c0_g1;DN42491_c0_g1;DN52133_c0_g2;DN52770_c0_g1;DN61121…

## Sheet:  biological process
#GO_classify	Unigenes_gene_num	Unigenes_gene_ids
>biological process
reproduction	786	DN64527_c3_g5;DN88892_c0_g1;DN54407_c0_g1;DN42674_c0_g1;DN48574_c0_g1;DN46901_c0_g1;DN13222_c0_g1;DN22659_c0_g1;DN87660_c0_g1;DN62040_c0_g2;DN62599_c2_g1;DN56195_c0_g2;DN24532_c0_g1;DN83512_c0_g1;DN64093_c0_g1;DN5858_c0_g1;DN42634_c0_g1;DN61795_c2_g3;DN58697_c0_g1;DN44536_c0_g1;DN53464_c0_g1;DN66125_c0_g1;DN8005_c0_g1;DN42051_c0_g1;DN37624_c0_g1;DN75589_c0_g1;DN35876_c0_g1;DN43809_c0_g1;DN14910_c…
cell killing	20	DN87006_c0_g1;DN23470_c0_g1;DN64988_c0_g1;DN84345_c0_g1;DN61982_c0_g2;DN51577_c0_g1;DN48985_c0_g1;DN22512_c0_g1;DN8714_c0_g1;DN89531_c0_g1;DN18578_c0_g1;DN89831_c0_g1;DN75178_c0_g1;DN4682_c0_g1;DN39146_c0_g1;DN56505_c0_g1;DN50701_c0_g1;DN27831_c0_g1;DN64527_c3_g2;DN85527_c0_g1
immune system process	519	DN74521_c0_g1;DN29057_c0_g1;DN82202_c0_g1;DN60600_c1_g1;DN59864_c0_g1;DN45040_c0_g3;DN71086_c0_g1;DN50598_c0_g1;DN60948_c0_g5;DN61463_c1_g5;DN46669_c1_g1;DN63096_c1_g1;DN45082_c0_g1;DN68849_c0_g1;DN51581_c0_g1;DN8458_c0_g1;DN79722_c0_g1;DN35224_c0_g1;DN38477_c0_g1;DN57711_c0_g1;DN61425_c0_g2;DN88343_c0_g1;DN63391_c1_g11;DN71683_c0_g1;DN78766_c0_g1;DN54573_c0_g1;DN49586_c0_g2;DN31113_c0_g2;DN49574…
metabolic process	33227	DN57716_c0_g1;DN64369_c1_g1;DN51859_c0_g1;DN79360_c0_g1;DN88538_c0_g1;DN33930_c0_g1;DN40184_c0_g1;DN9530_c0_g2;DN14294_c0_g1;DN56531_c0_g2;DN9817_c0_g1;DN33835_c0_g1;DN68342_c0_g1;DN54584_c0_g1;DN88054_c0_g1;DN44461_c0_g2;DN81899_c0_g1;DN790_c0_g1;DN83108_c0_g1;DN83025_c0_g1;DN42819_c0_g1;DN26158_c0_g1;DN27778_c0_g2;DN64646_c2_g3;DN29509_c0_g1;DN66912_c0_g1;DN79512_c0_g1;DN59706_c0_g1;DN47467_c0_…
;DN29384_c0_g2;DN63859_c2_g4;DN46669_c2_g3;DN55016_c0_g1;DN72192_c0_g1;DN60210_c0_g1;DN70791_c0_g1;DN10790_c0_g1;DN56105_c1_g1;DN45084_c0_g5;DN52743_c0_g1;DN52978_c1_g1;DN58208_c2_g1;DN35876_c0_g3;DN42449_c0_g1;DN55920_c0_g1;DN6976_c0_g1;DN84855_c0_g1;DN62440_c1_g1;DN69256_c0_g1;DN28782_c0_g1;DN63285_c0_g2;DN45909_c0_g1;DN75578_c0_g1;DN2329_c0_g1;DN86091_c0_g1;DN64180_c2_g1;DN40768_c0_g1;DN5028_c…
RINITY_DN62428_c0_g1;DN24491_c0_g1;DN19359_c0_g1;DN68032_c0_g1;DN76792_c0_g1;DN43667_c0_g2;DN71959_c0_g1;DN68600_c0_g1;DN61150_c0_g6;DN79782_c0_g1;DN64671_c4_g2;DN10084_c0_g1;DN41546_c0_g2;DN53362_c0_g1;DN57884_c1_g2;DN50947_c0_g1;DN57945_c0_g1;DN3029_c0_g1;DN64332_c0_g6;DN49452_c0_g1;DN38309_c0_g2;DN56867_c0_g1;DN29279_c0_g2;DN5071_c0_g1;DN58536_c1_g1;DN59713_c0_g1;DN86080_c0_g1;DN21604_c0_g1;DN…
_DN72411_c0_g1;DN57775_c0_g1;DN52133_c0_g1;DN66835_c0_g1;DN49645_c0_g2;DN25464_c0_g1;DN51951_c0_g2;DN51583_c0_g1;DN81960_c0_g1;DN53203_c0_g2;DN29960_c0_g1;DN43687_c0_g3;DN65986_c0_g1;DN10731_c0_g1;DN78572_c0_g1;DN23292_c0_g1;DN63365_c1_g3;DN61847_c0_g1;DN53280_c0_g1;DN62612_c0_g2;DN52780_c1_g1;DN41391_c0_g1;DN64847_c4_g1;DN63793_c1_g2;DN57880_c2_g5;DN54730_c1_g6;DN62031_c0_g1;DN51437_c0_g1;DN3759…
DN75789_c0_g1;DN79169_c0_g1;DN43051_c0_g2;DN55640_c1_g2;DN75416_c0_g1;DN36665_c0_g2;DN61143_c2_g2;DN64306_c1_g1;DN41416_c0_g1;DN76982_c0_g1;DN56382_c0_g1;DN30863_c0_g2;DN61687_c0_g4;DN85549_c0_g1;DN64462_c2_g6;DN64658_c1_g3;DN81902_c0_g1;DN80916_c0_g1;DN89183_c0_g2;DN32557_c0_g1;DN18178_c0_g1;DN48699_c0_g1;DN48091_c0_g2;DN70482_c0_g1;DN43619_c0_g3;DN54309_c0_g1;DN68363_c0_g3;DN60519_c0_g1;DN63272…
_g1;DN68284_c0_g1;DN64944_c0_g1;DN82835_c0_g1;DN61238_c0_g2;DN60418_c0_g1;DN61643_c0_g1;DN15203_c0_g2;DN76406_c0_g1;DN73377_c0_g1;DN83111_c0_g1;DN61814_c0_g1;DN61563_c0_g3;DN25509_c0_g1;DN9086_c0_g1;DN68357_c0_g1;DN68730_c0_g1;DN63953_c0_g2;DN41909_c0_g2;DN63645_c0_g1;DN40178_c0_g2;DN73212_c0_g1;DN62184_c1_g1;DN12691_c0_g1;DN44956_c0_g1;DN56925_c0_g1;DN16013_c0_g2;DN50134_c0_g1;DN51632_c0_g1;DN14…
RINITY_DN65081_c0_g1;DN37636_c0_g3;DN45276_c0_g3;DN90000_c0_g1;DN60268_c0_g2;DN50395_c0_g1;DN26431_c0_g2;DN63996_c0_g3;DN56859_c3_g7;DN53503_c0_g1;DN9839_c0_g1;DN54130_c1_g1;DN74795_c0_g1;DN55607_c0_g2;DN38218_c0_g1;DN1516_c0_g1;DN57773_c0_g1;DN48706_c0_g1;DN31537_c0_g1;DN50074_c0_g1;DN89437_c0_g1;DN31063_c0_g1;DN31989_c0_g2;DN64208_c0_g3;DN25174_c0_g3;DN2819_c0_g1;DN40718_c0_g1;DN51870_c0_g1;DN5…
N46915_c0_g1;DN27191_c0_g2;DN64420_c1_g3;DN7165_c0_g1;DN56085_c0_g1;DN54424_c0_g1;DN60749_c1_g1;DN35935_c0_g2;DN62914_c0_g1;DN65072_c0_g1;DN35453_c0_g1;DN64865_c0_g3;DN57357_c0_g2;DN64728_c0_g6;DN26667_c0_g1;DN63443_c0_g2;DN91241_c0_g1;DN46495_c0_g1;DN52539_c0_g2;DN11716_c0_g1;DN25701_c0_g2;DN1204_c0_g1;DN89167_c0_g1;DN45181_c0_g1;DN38162_c1_g1;DN57332_c0_g1;DN24996_c0_g2;DN59605_c0_g1;DN64505_c0…
DN61718_c0_g1;DN28717_c0_g1;DN83070_c0_g1;DN83421_c0_g1;DN9296_c0_g1;DN47487_c0_g1;DN43088_c0_g4;DN51772_c0_g1;DN40017_c0_g1;DN32426_c0_g2;DN53381_c1_g1;DN36739_c0_g1;DN82810_c0_g1;DN59906_c0_g1;DN73072_c0_g1;DN65379_c0_g1;DN65526_c0_g1;DN27238_c0_g1;DN49752_c0_g2;DN86827_c0_g1;DN4000_c0_g1;DN52439_c0_g2;DN51977_c0_g1;DN59936_c0_g1;DN53518_c0_g4;DN25244_c0_g2;DN80430_c0_g1;DN58918_c0_g1;DN59230_c…
0_g1;DN58735_c1_g1;DN64153_c0_g1;DN15515_c0_g1;DN60813_c0_g2;DN51976_c0_g2;DN47754_c1_g2;DN29294_c0_g1;DN50658_c0_g1;DN64767_c3_g3;DN82098_c0_g1;DN43447_c0_g1;DN89785_c0_g1;DN72194_c0_g1;DN3374_c1_g1;DN63743_c2_g2;DN57736_c0_g7;DN15484_c0_g1;DN37222_c0_g1;DN50965_c0_g1;DN91110_c0_g1;DN76700_c0_g1;DN70679_c0_g1;DN54640_c1_g2;DN59943_c0_g1;DN53071_c0_g1;DN59307_c1_g1;DN74442_c0_g2;DN12998_c0_g2;DN6…
;DN57085_c0_g1;DN58978_c0_g4;DN42034_c0_g1;DN84892_c0_g1;DN77431_c0_g1;DN43403_c0_g1;DN40930_c0_g2;DN14224_c1_g1;DN44313_c0_g1;DN63535_c0_g2;DN85599_c0_g1;DN50401_c0_g2;DN61544_c0_g4;DN70286_c0_g1;DN67604_c0_g1;DN83256_c0_g1;DN56883_c2_g5;DN33204_c0_g1;DN4152_c0_g1;DN83064_c0_g1;DN79083_c0_g1;DN83247_c0_g1;DN63098_c0_g4;DN63555_c0_g1;DN70916_c0_g1;DN52396_c0_g1;DN1068_c0_g1;DN46661_c0_g1;DN74660_…
RINITY_DN59374_c0_g1;DN49871_c0_g1;DN58975_c1_g5;DN46857_c0_g1;DN67840_c0_g1;DN50995_c0_g1;DN25582_c0_g1;DN54879_c0_g5;DN85075_c0_g1;DN63873_c1_g1;DN70322_c0_g1;DN63711_c1_g4;DN52568_c0_g1;DN70640_c0_g1;DN53625_c1_g1;DN40157_c0_g1;DN8670_c0_g1;DN32802_c0_g1;DN60998_c2_g3;DN90670_c0_g1;DN63266_c0_g3;DN62338_c0_g1;DN44113_c0_g1;DN35417_c0_g3;DN80188_c0_g1;DN52511_c0_g3;DN72581_c0_g1;DN60948_c0_g9;D…
56843_c0_g1;DN14747_c0_g1;DN57672_c0_g6;DN30298_c0_g1;DN59571_c0_g4;DN62359_c2_g4;DN74878_c0_g1;DN25411_c0_g1;DN49042_c0_g1;DN15172_c0_g1;DN62828_c0_g3;DN75025_c0_g1;DN8663_c0_g1;DN59336_c0_g1;DN60295_c0_g1;DN68717_c0_g1;DN39735_c0_g1;DN23370_c0_g1;DN91582_c0_g1;DN64514_c5_g6;DN52666_c0_g2;DN79325_c0_g1;DN9442_c0_g1;DN38816_c0_g1;DN81504_c0_g1;DN123_c0_g1;DN68775_c0_g1;DN64212_c1_g4;DN46709_c0_g1…
;DN89732_c0_g1;DN36928_c0_g1;DN81916_c0_g1;DN24894_c0_g1;DN61033_c0_g1;DN57699_c0_g3;DN7209_c0_g1;DN56504_c0_g3;DN77004_c0_g1;DN90346_c0_g1;DN54693_c0_g2;DN61079_c0_g1;DN7513_c0_g1;DN563_c0_g1;DN52088_c0_g1;DN85170_c0_g1;DN81501_c0_g1;DN29644_c1_g1;DN48655_c0_g1;DN76839_c0_g1;DN54929_c0_g1;DN81869_c0_g1;DN49448_c0_g1;DN60901_c0_g2;DN63417_c0_g1;DN40362_c0_g2;DN86987_c0_g1;DN74419_c0_g1;DN57586_c0…
DN57508_c0_g1;DN80400_c0_g1;DN33714_c0_g1;DN38239_c0_g2;DN60029_c0_g1;DN58616_c0_g3;DN74416_c0_g1;DN89297_c0_g1;DN62080_c0_g4;DN83762_c0_g1;DN78510_c0_g1;DN48757_c0_g1;DN64581_c0_g5;DN47574_c0_g1;DN84139_c0_g1;DN1197_c0_g2;DN62065_c4_g5;DN75590_c0_g1;DN43513_c0_g1;DN88265_c0_g1;DN26673_c0_g2;DN9134_c0_g1;DN17326_c0_g1;DN68644_c0_g1;DN62241_c1_g1;DN63037_c0_g2;DN19612_c0_g1;DN55813_c0_g1;DN56051_c…
RINITY_DN48796_c0_g2;DN63578_c2_g1;DN6480_c0_g1;DN60610_c2_g2;DN658_c0_g1;DN57278_c0_g1;DN53884_c0_g3;DN63210_c1_g2;DN89195_c0_g1;DN46768_c0_g1;DN67449_c0_g1;DN56959_c0_g3;DN20845_c0_g1;DN67724_c0_g1;DN35719_c0_g1;DN63290_c0_g5;DN53074_c0_g2;DN77173_c0_g1;DN15837_c0_g1;DN70116_c0_g1;DN63769_c0_g1;DN89890_c0_g1;DN48080_c0_g1;DN53627_c0_g1;DN44063_c0_g1;DN58512_c0_g1;DN63923_c0_g6;DN45935_c0_g1;DN5…
NITY_DN40805_c0_g3;DN27314_c0_g1;DN42800_c0_g2;DN1807_c0_g1;DN32212_c0_g2;DN4593_c0_g1;DN39728_c0_g1;DN47218_c0_g1;DN45936_c0_g1;DN61422_c1_g1;DN43319_c0_g1;DN77991_c0_g1;DN40247_c1_g1;DN50300_c1_g1;DN17340_c0_g1;DN53876_c0_g1;DN79843_c0_g1;DN55495_c0_g3;DN66808_c0_g1;DN76636_c0_g1;DN63426_c0_g1;DN65349_c0_g1;DN64668_c2_g2;DN26596_c0_g1;DN62647_c1_g7;DN9394_c0_g1;DN90908_c0_g1;DN4813_c0_g1;DN8911…
INITY_DN57607_c1_g1;DN74125_c0_g1;DN45189_c0_g1;DN13173_c1_g1;DN90911_c0_g1;DN8238_c0_g1;DN30156_c0_g1;DN68583_c0_g1;DN59924_c0_g2;DN82463_c0_g1;DN85572_c0_g1;DN41277_c0_g1;DN62711_c0_g1;DN85082_c0_g1;DN48961_c0_g1;DN54532_c0_g1;DN24522_c0_g1;DN30188_c0_g1;DN63998_c0_g3;DN57041_c1_g1;DN47677_c0_g1;DN69082_c0_g1;DN29887_c1_g1;DN63925_c0_g6;DN89943_c0_g1;DN62052_c0_g1;DN6097_c0_g1;DN66610_c0_g1;DN4…
RINITY_DN12738_c0_g1;DN67554_c0_g1;DN60211_c0_g1;DN61342_c1_g2;DN6350_c0_g1;DN58555_c1_g8;DN13156_c0_g1;DN66243_c0_g1;DN71351_c0_g1;DN39720_c0_g2;DN49168_c0_g1;DN72189_c0_g1;DN54075_c0_g1;DN39513_c0_g1;DN2367_c0_g1;DN16958_c0_g1;DN63362_c1_g3;DN74166_c0_g1;DN50405_c0_g2;DN55476_c1_g7;DN56461_c0_g7;DN79408_c0_g1;DN58727_c0_g2;DN25156_c0_g1;DN58551_c0_g10;DN44497_c0_g2;DN27368_c0_g1;DN51687_c0_g1;D…
_c0_g1;DN29438_c0_g1;DN16024_c0_g1;DN9788_c0_g1;DN48624_c1_g2;DN3800_c0_g1;DN54023_c0_g1;DN34523_c0_g3;DN84167_c0_g1;DN62638_c0_g2;DN55165_c0_g1;DN42595_c1_g3;DN86393_c0_g1;DN41121_c0_g1;DN48073_c0_g1;DN5258_c0_g1;DN58247_c0_g1;DN43314_c0_g1;DN13608_c0_g1;DN16293_c0_g1;DN63699_c0_g4;DN63651_c0_g4;DN59265_c0_g8;DN53042_c7_g4;DN45495_c0_g2;DN7571_c0_g1;DN66770_c0_g1;DN43190_c0_g2;DN53584_c0_g1;DN59…
0_g1;DN58490_c0_g1;DN51797_c0_g1;DN82428_c0_g1;DN49534_c0_g1;DN59218_c0_g1;DN63621_c0_g3;DN1525_c0_g2;DN76245_c0_g1;DN69732_c0_g1;DN57554_c0_g1;DN70627_c0_g1;DN64344_c0_g3;DN73782_c0_g1;DN37547_c0_g1;DN51202_c1_g1;DN58184_c0_g2;DN57580_c1_g4;DN83584_c0_g1;DN9036_c0_g1;DN42858_c0_g1;DN85546_c0_g1;DN2236_c0_g1;DN62364_c0_g3;DN63069_c0_g1;DN85202_c0_g1;DN60959_c0_g1;DN58813_c0_g10;DN31103_c0_g1;DN60…
g1;DN60187_c0_g1;DN36126_c0_g2;DN45250_c0_g2;DN83613_c0_g1;DN89673_c0_g1;DN5149_c0_g1;DN89877_c0_g1;DN23430_c0_g1;DN2915_c0_g1;DN74995_c0_g1;DN70320_c0_g1;DN87661_c0_g1;DN27649_c0_g2;DN63058_c0_g5;DN74595_c0_g1;DN1998_c0_g1;DN51006_c0_g1;DN57637_c0_g3;DN26926_c0_g1;DN64875_c0_g5;DN36967_c0_g1;DN90426_c0_g1;DN63906_c1_g4;DN66356_c0_g1;DN41916_c0_g1;DN50031_c0_g2;DN63791_c1_g13;DN61244_c0_g1;DN7669…
Y_DN54155_c0_g1;DN89044_c0_g1;DN55973_c1_g1;DN42251_c0_g1;DN85803_c0_g1;DN84296_c0_g1;DN76654_c0_g1;DN34294_c0_g1;DN84280_c0_g1;DN30518_c0_g1;DN72699_c0_g1;DN87355_c0_g1;DN53646_c0_g1;DN74486_c0_g1;DN43217_c0_g1;DN75757_c0_g1;DN77666_c0_g2;DN27239_c0_g1;DN87112_c0_g1;DN86247_c0_g1;DN75621_c0_g1;DN64677_c0_g1;DN77561_c0_g1;DN64680_c1_g8;DN2990_c0_g1;DN53512_c0_g2;DN4680_c0_g1;DN61473_c0_g1;DN88913…
cellular process	26914	DN63707_c2_g3;DN30281_c0_g1;DN59624_c0_g2;DN58652_c0_g2;DN44536_c0_g1;DN78422_c0_g1;DN60115_c0_g2;DN85491_c0_g1;DN90693_c0_g1;DN53161_c0_g4;DN69762_c0_g1;DN68065_c0_g1;DN42634_c0_g1;DN74460_c0_g1;DN23956_c0_g1;DN63392_c0_g5;DN74279_c0_g1;DN41238_c0_g2;DN36832_c0_g1;DN84819_c0_g1;DN35919_c0_g3;DN8171_c0_g1;DN58827_c1_g1;DN71339_c0_g1;DN64483_c0_g3;DN60312_c0_g1;DN90788_c0_g1;DN20632_c0_g1;DN71352_…
NITY_DN58315_c2_g2;DN65509_c0_g1;DN80793_c0_g1;DN49374_c1_g2;DN43898_c0_g1;DN34653_c0_g2;DN21897_c0_g1;DN2275_c0_g1;DN80105_c0_g1;DN47222_c0_g1;DN85979_c0_g1;DN40481_c0_g1;DN12559_c0_g1;DN13835_c0_g1;DN61231_c1_g2;DN59757_c1_g2;DN36795_c0_g1;DN73909_c0_g1;DN77630_c0_g1;DN46405_c0_g1;DN60152_c0_g1;DN83833_c0_g1;DN64851_c1_g8;DN61095_c0_g3;DN82342_c0_g1;DN57483_c0_g7;DN57001_c0_g7;DN58414_c0_g3;DN5…
3_c0_g1;DN57375_c0_g4;DN78521_c0_g1;DN29180_c0_g1;DN12601_c0_g1;DN41056_c0_g1;DN65608_c0_g1;DN43726_c0_g1;DN64837_c2_g6;DN56035_c0_g3;DN62226_c0_g2;DN19329_c0_g1;DN48543_c0_g2;DN73253_c0_g1;DN87585_c0_g1;DN21625_c0_g1;DN60150_c0_g1;DN55992_c0_g1;DN57273_c0_g2;DN58829_c1_g4;DN56690_c0_g1;DN48838_c0_g1;DN58255_c0_g1;DN37906_c0_g2;DN67435_c0_g1;DN62257_c0_g3;DN52019_c0_g1;DN41402_c0_g1;DN72399_c0_g1…
1;DN60680_c0_g2;DN74259_c0_g1;DN77658_c0_g1;DN2540_c0_g1;DN36055_c0_g2;DN49631_c0_g1;DN71283_c0_g1;DN53578_c0_g1;DN70513_c0_g1;DN3311_c0_g1;DN59808_c0_g3;DN80000_c0_g1;DN33505_c0_g1;DN26520_c0_g1;DN38206_c0_g2;DN86155_c0_g1;DN43973_c1_g1;DN56834_c1_g4;DN29497_c0_g2;DN31876_c0_g1;DN11893_c0_g1;DN62255_c0_g1;DN75265_c0_g1;DN1877_c0_g1;DN3060_c0_g2;DN48814_c0_g2;DN60220_c1_g1;DN78597_c0_g1;DN72920_c…
TY_DN52600_c0_g1;DN47003_c0_g1;DN86822_c0_g1;DN57357_c0_g1;DN62949_c0_g1;DN57409_c1_g1;DN64701_c1_g3;DN74280_c0_g1;DN44913_c0_g1;DN60031_c0_g3;DN8638_c0_g1;DN22802_c0_g1;DN35324_c1_g1;DN64173_c0_g3;DN16292_c0_g2;DN61399_c1_g8;DN52106_c0_g1;DN62687_c1_g3;DN80806_c0_g1;DN37796_c0_g3;DN26709_c0_g1;DN7021_c0_g1;DN22328_c0_g1;DN16121_c0_g1;DN75627_c0_g1;DN74767_c0_g1;DN50878_c0_g1;DN58141_c0_g2;DN7386…
;DN12809_c0_g1;DN87436_c0_g1;DN55489_c0_g1;DN72010_c0_g1;DN18609_c0_g1;DN37166_c0_g1;DN45924_c0_g1;DN89651_c0_g1;DN54936_c0_g1;DN13945_c1_g1;DN63854_c0_g1;DN64149_c0_g10;DN90484_c0_g1;DN64925_c3_g8;DN61450_c0_g1;DN49050_c1_g1;DN21728_c0_g1;DN85687_c0_g1;DN7755_c0_g1;DN17152_c0_g2;DN51053_c0_g1;DN34791_c0_g1;DN34142_c0_g2;DN73975_c0_g1;DN62031_c0_g4;DN18585_c0_g1;DN60079_c0_g3;DN62293_c0_g5;DN8568…
TY_DN59975_c0_g1;DN36654_c0_g4;DN1707_c0_g1;DN21744_c0_g1;DN58964_c0_g1;DN83798_c0_g1;DN67535_c0_g1;DN48547_c0_g2;DN61940_c0_g4;DN60393_c1_g1;DN49304_c0_g1;DN34807_c0_g1;DN51317_c1_g1;DN59904_c0_g1;DN87506_c0_g1;DN18350_c0_g1;DN69665_c0_g1;DN51035_c0_g2;DN66768_c0_g1;DN64223_c0_g3;DN42690_c0_g1;DN84569_c0_g1;DN71692_c0_g1;DN41303_c0_g1;DN85966_c0_g1;DN84820_c0_g1;DN68099_c0_g1;DN39922_c0_g2;DN834…
Y_DN48062_c0_g1;DN54689_c0_g1;DN1260_c0_g1;DN73693_c0_g1;DN61244_c0_g3;DN48145_c0_g1;DN44365_c0_g2;DN63095_c0_g1;DN56311_c0_g1;DN59134_c0_g3;DN44188_c0_g1;DN70426_c0_g1;DN62307_c1_g3;DN87760_c0_g1;DN52264_c0_g1;DN18076_c0_g1;DN74961_c0_g1;DN35102_c0_g1;DN58610_c0_g2;DN71177_c0_g1;DN57322_c0_g1;DN31480_c1_g1;DN47651_c0_g1;DN59103_c1_g3;DN58038_c1_g2;DN60220_c0_g1;DN52975_c0_g2;DN26418_c0_g1;DN5768…
DN60083_c0_g1;DN63803_c0_g4;DN81915_c0_g1;DN47848_c0_g1;DN39020_c0_g1;DN55554_c1_g1;DN59827_c1_g8;DN58916_c0_g1;DN63552_c1_g5;DN58259_c0_g2;DN1003_c0_g1;DN79036_c0_g1;DN76899_c0_g1;DN6192_c0_g1;DN67478_c0_g1;DN4028_c0_g1;DN55493_c0_g2;DN46814_c0_g2;DN64190_c0_g1;DN55256_c0_g2;DN72109_c0_g1;DN33061_c0_g3;DN38222_c0_g1;DN74473_c0_g1;DN54207_c2_g4;DN83532_c0_g1;DN59413_c0_g3;DN64781_c1_g1;DN62305_c0…
666_c0_g1;DN5521_c0_g1;DN44323_c0_g2;DN64452_c0_g1;DN65022_c0_g1;DN84186_c0_g1;DN64252_c1_g4;DN38667_c0_g1;DN59289_c0_g1;DN28762_c1_g1;DN62003_c2_g2;DN18153_c0_g1;DN18297_c0_g2;DN83345_c0_g1;DN47550_c0_g1;DN38273_c0_g2;DN43254_c0_g1;DN85866_c0_g1;DN63398_c0_g1;DN49783_c0_g1;DN54785_c0_g1;DN51782_c0_g1;DN36822_c0_g2;DN62623_c0_g4;DN57000_c0_g1;DN63500_c0_g1;DN40652_c0_g1;DN9405_c0_g1;DN20246_c0_g1…
9_c0_g1;DN40317_c0_g1;DN64051_c0_g5;DN61331_c1_g1;DN63343_c1_g1;DN17692_c0_g1;DN88400_c0_g1;DN57717_c0_g1;DN18564_c0_g1;DN29987_c0_g2;DN54063_c0_g1;DN26773_c0_g1;DN59578_c0_g1;DN72096_c0_g1;DN35341_c0_g1;DN51356_c0_g1;DN82680_c0_g1;DN76562_c0_g1;DN60142_c0_g2;DN89587_c0_g1;DN44392_c0_g1;DN56843_c0_g3;DN63607_c0_g1;DN32138_c0_g1;DN58509_c0_g3;DN48903_c0_g2;DN13009_c0_g1;DN78645_c0_g1;DN52380_c0_g2…
_DN37967_c0_g2;DN53156_c3_g1;DN48550_c0_g1;DN42846_c0_g1;DN54766_c0_g5;DN59251_c0_g1;DN59830_c0_g2;DN50440_c0_g1;DN49279_c0_g1;DN43654_c0_g1;DN53441_c0_g1;DN16582_c0_g1;DN89125_c0_g1;DN56163_c0_g4;DN50712_c0_g1;DN8266_c0_g1;DN63348_c0_g4;DN64306_c1_g3;DN55822_c0_g1;DN88820_c0_g1;DN45060_c0_g1;DN82832_c0_g1;DN48715_c1_g1;DN73400_c0_g1;DN57805_c0_g1;DN58290_c2_g3;DN61816_c1_g1;DN73972_c0_g1;DN71659…
_DN54760_c0_g5;DN67004_c0_g1;DN51578_c0_g1;DN79216_c0_g1;DN87937_c0_g1;DN56100_c0_g1;DN52613_c0_g3;DN86341_c0_g1;DN36752_c0_g2;DN91265_c0_g1;DN87223_c0_g1;DN15260_c0_g1;DN63946_c0_g1;DN86482_c0_g1;DN56754_c0_g2;DN41866_c0_g1;DN59856_c3_g4;DN59064_c0_g2;DN64337_c2_g4;DN58175_c0_g1;DN52013_c0_g4;DN11792_c0_g1;DN2616_c0_g1;DN41721_c0_g1;DN59013_c1_g1;DN76164_c0_g1;DN33715_c0_g3;DN60417_c0_g1;DN82896…
NITY_DN12990_c0_g1;DN63725_c0_g1;DN36683_c0_g1;DN83119_c0_g1;DN25589_c0_g2;DN55858_c0_g1;DN19891_c0_g1;DN31507_c0_g1;DN64844_c2_g5;DN73419_c0_g1;DN52399_c1_g1;DN7892_c1_g1;DN76658_c0_g1;DN57701_c0_g1;DN52314_c0_g1;DN70811_c0_g1;DN61782_c0_g1;DN62582_c0_g3;DN45949_c0_g1;DN36540_c0_g1;DN62511_c0_g1;DN68891_c0_g1;DN66783_c0_g1;DN61675_c0_g1;DN42783_c1_g5;DN53441_c0_g3;DN60155_c3_g6;DN53940_c1_g1;DN5…
g1;DN60190_c0_g3;DN48334_c1_g2;DN64213_c1_g4;DN62756_c2_g3;DN77641_c0_g1;DN74266_c0_g1;DN48213_c0_g1;DN62019_c0_g1;DN12971_c0_g1;DN58260_c0_g1;DN71024_c0_g1;DN54215_c0_g1;DN75268_c0_g1;DN72580_c0_g1;DN52270_c0_g2;DN51535_c0_g1;DN74356_c0_g1;DN42671_c0_g1;DN81575_c0_g1;DN61372_c0_g1;DN28831_c0_g1;DN82832_c0_g2;DN78864_c0_g1;DN32731_c0_g1;DN56459_c0_g1;DN35375_c0_g1;DN91050_c0_g1;DN80996_c0_g1;DN43…
N55306_c0_g1;DN16841_c0_g1;DN79657_c0_g1;DN81517_c0_g1;DN83249_c0_g1;DN64849_c2_g2;DN37501_c2_g1;DN34458_c0_g1;DN85326_c0_g1;DN66345_c0_g1;DN45460_c0_g1;DN63393_c0_g5;DN50137_c0_g1;DN45812_c0_g2;DN71482_c0_g1;DN49837_c0_g1;DN57902_c0_g1;DN58434_c0_g1;DN59220_c0_g1;DN64569_c2_g3;DN77051_c0_g1;DN70571_c0_g1;DN83393_c0_g1;DN13873_c0_g1;DN44860_c0_g1;DN13735_c0_g1;DN63612_c0_g1;DN46901_c0_g2;DN1717_c…
DN33751_c0_g1;DN89823_c0_g1;DN51018_c0_g1;DN48183_c0_g1;DN55569_c0_g1;DN56673_c0_g2;DN59591_c0_g4;DN32048_c1_g1;DN80962_c0_g1;DN61783_c0_g2;DN27579_c0_g1;DN27649_c0_g2;DN68043_c0_g1;DN73894_c0_g1;DN83377_c0_g1;DN43001_c0_g1;DN70320_c0_g1;DN67862_c0_g1;DN32361_c0_g1;DN51428_c0_g1;DN47576_c0_g2;DN55883_c1_g1;DN53615_c0_g11;DN2915_c0_g1;DN77453_c0_g1;DN83613_c0_g1;DN81271_c0_g1;DN89877_c0_g1;DN89383…
98_c0_g3;DN8899_c0_g1;DN62351_c0_g1;DN84460_c0_g1;DN46544_c0_g1;DN51638_c0_g2;DN54571_c0_g3;DN42669_c0_g2;DN56883_c2_g9;DN34229_c0_g1;DN64241_c0_g1;DN64926_c5_g1;DN83288_c0_g1;DN6150_c0_g1;DN45762_c1_g1;DN80813_c0_g1;DN40897_c0_g1;DN47271_c0_g1;DN6252_c0_g1;DN50433_c0_g2;DN36930_c0_g1;DN19721_c0_g1;DN64317_c1_g4;DN87465_c0_g1;DN57666_c0_g2;DN64516_c0_g2;DN58813_c0_g11;DN91399_c0_g1;DN60482_c0_g1;…
1836_c0_g1;DN49488_c0_g2;DN41302_c0_g1;DN61075_c0_g1;DN57641_c0_g2;DN64025_c0_g4;DN61054_c0_g1;DN6040_c0_g2;DN43518_c0_g1;DN46152_c0_g1;DN39848_c0_g1;DN6285_c0_g1;DN51929_c0_g1;DN76515_c0_g1;DN60096_c0_g1;DN54130_c1_g4;DN27382_c0_g1;DN84549_c0_g1;DN60332_c0_g3;DN65029_c0_g1;DN40693_c0_g1;DN61105_c1_g1;DN70680_c0_g1;DN71319_c0_g1;DN75284_c0_g1;DN8562_c0_g1;DN72247_c0_g1;DN78573_c0_g1;DN22875_c0_g1…
reproductive process	1578	DN83562_c0_g1;DN54479_c0_g1;DN59535_c0_g1;DN63359_c2_g8;DN48857_c0_g2;DN41531_c0_g1;DN49972_c0_g1;DN28838_c0_g1;DN72734_c0_g1;DN59329_c0_g1;DN48536_c0_g1;DN48975_c0_g1;DN56932_c2_g2;DN40612_c0_g2;DN59918_c0_g1;DN37065_c0_g2;DN70224_c0_g1;DN3175_c0_g1;DN57582_c0_g1;DN73744_c0_g1;DN63685_c0_g2;DN59256_c0_g4;DN51680_c0_g1;DN55236_c0_g1;DN54987_c2_g3;DN74293_c0_g1;DN49228_c0_g1;DN70455_c0_g1;DN66578_…
_DN49170_c0_g1;DN59364_c0_g1;DN3175_c0_g2;DN15638_c0_g1;DN41507_c0_g1;DN4985_c0_g1;DN69908_c0_g1;DN84179_c0_g1;DN36948_c1_g1;DN63558_c0_g3;DN19746_c0_g1;DN59822_c0_g1;DN56175_c0_g1;DN83064_c0_g1;DN53963_c0_g1;DN38233_c0_g1;DN66930_c0_g1;DN29282_c0_g1;DN59993_c0_g1;DN32775_c0_g2;DN59266_c1_g3;DN57345_c0_g1;DN53359_c0_g1;DN57943_c0_g1;DN79607_c0_g1;DN46147_c0_g3;DN28838_c0_g2;DN65902_c0_g1;DN59767_…
biological adhesion	80	DN13784_c0_g1;DN61527_c1_g2;DN38392_c0_g3;DN88076_c0_g1;DN58152_c2_g6;DN57134_c0_g2;DN61313_c0_g1;DN51961_c0_g2;DN54658_c0_g1;DN44179_c0_g1;DN62443_c0_g1;DN62514_c0_g1;DN70322_c0_g1;DN64264_c0_g2;DN27210_c0_g2;DN54413_c0_g2;DN38392_c0_g2;DN68556_c0_g1;DN56669_c0_g1;DN54658_c0_g2;DN62514_c1_g1;DN55097_c0_g1;DN64104_c1_g2;DN62514_c0_g4;DN38392_c0_g1;DN54194_c0_g2;DN65050_c0_g1;DN13989_c0_g1;DN66369…
signaling	2026	DN78719_c0_g1;DN84188_c0_g1;DN6887_c0_g1;DN76081_c0_g1;DN62456_c1_g5;DN7618_c0_g1;DN6205_c0_g1;DN58354_c1_g1;DN17105_c0_g1;DN52013_c0_g7;DN44502_c0_g1;DN52133_c0_g1;DN3176_c0_g1;DN59065_c0_g1;DN83476_c0_g1;DN49850_c0_g1;DN88189_c0_g1;DN6764_c0_g1;DN28534_c0_g1;DN35125_c0_g1;DN49524_c1_g4;DN845_c0_g1;DN36876_c0_g1;DN25198_c0_g1;DN61520_c0_g1;DN39735_c0_g1;DN60682_c0_g4;DN36668_c0_g2;DN67127_c0_g1;…
540_c0_g1;DN26508_c0_g1;DN88638_c0_g1;DN54194_c0_g3;DN22484_c0_g3;DN46103_c0_g1;DN63205_c0_g2;DN62015_c0_g1;DN48034_c0_g1;DN46631_c0_g1;DN61635_c0_g1;DN73083_c0_g2;DN45879_c0_g1;DN49338_c0_g1;DN63528_c1_g12;DN52458_c0_g1;DN60553_c0_g2;DN52882_c0_g1;DN77848_c0_g1;DN35323_c1_g1;DN32898_c0_g1;DN64051_c0_g5;DN43447_c0_g1;DN63193_c0_g1;DN56751_c0_g2;DN52133_c0_g2;DN52603_c0_g1;DN50736_c0_g1;DN64290_c0…
multicellular organismal process	2108	DN77962_c0_g1;DN55130_c0_g1;DN8765_c0_g1;DN60899_c0_g2;DN46946_c1_g1;DN42187_c0_g1;DN31635_c0_g2;DN62456_c1_g5;DN87692_c0_g1;DN72364_c0_g2;DN56000_c0_g1;DN52792_c0_g1;DN53834_c0_g1;DN35125_c0_g1;DN42019_c0_g1;DN57215_c0_g1;DN36876_c0_g1;DN64694_c1_g1;DN9038_c0_g2;DN56292_c0_g1;DN59717_c0_g1;DN45885_c0_g1;DN43084_c0_g1;DN31635_c0_g1;DN35779_c0_g1;DN46426_c0_g1;DN52821_c0_g1;DN89161_c0_g2;DN53473_c…
g1;DN58435_c0_g4;DN62988_c0_g3;DN65767_c0_g1;DN44163_c0_g2;DN61058_c0_g1;DN39452_c0_g2;DN6704_c0_g1;DN57951_c0_g3;DN5030_c0_g1;DN18144_c0_g1;DN44420_c0_g1;DN48605_c0_g1;DN29991_c0_g2;DN43358_c0_g2;DN55507_c0_g1;DN60654_c1_g1;DN37065_c0_g1;DN75492_c0_g1;DN49109_c0_g1;DN52050_c0_g1;DN7721_c0_g2;DN32022_c0_g1;DN8925_c0_g1;DN42241_c0_g1;DN34435_c0_g2;DN54620_c0_g1;DN63022_c1_g1;DN36920_c0_g2;DN52514_…
developmental process	3357	DN65520_c0_g1;DN82397_c0_g1;DN56347_c1_g4;DN50911_c0_g1;DN44960_c0_g3;DN64588_c0_g1;DN68605_c0_g1;DN55416_c0_g1;DN6837_c0_g1;DN58580_c0_g1;DN53841_c0_g1;DN35723_c0_g1;DN41489_c0_g1;DN87384_c0_g1;DN35723_c0_g2;DN70171_c0_g1;DN39927_c0_g2;DN64110_c0_g2;DN47260_c0_g1;DN50390_c0_g3;DN63615_c0_g1;DN64725_c0_g1;DN61012_c1_g4;DN67581_c0_g1;DN63754_c1_g1;DN54705_c1_g10;DN13959_c0_g1;DN89864_c0_g1;DN64694…
2418_c0_g1;DN46579_c0_g1;DN65327_c0_g1;DN52278_c2_g1;DN62999_c0_g4;DN81681_c0_g1;DN41483_c0_g1;DN61604_c0_g1;DN16223_c0_g1;DN61544_c0_g5;DN63379_c0_g1;DN49385_c0_g1;DN47396_c0_g1;DN41891_c0_g1;DN10253_c0_g1;DN8246_c0_g1;DN16748_c0_g1;DN65314_c0_g1;DN42662_c0_g3;DN57690_c0_g2;DN54282_c0_g4;DN48360_c0_g1;DN1204_c0_g1;DN45801_c0_g2;DN77137_c0_g1;DN57231_c3_g6;DN31077_c0_g2;DN53447_c0_g2;DN9808_c0_g1…
g2;DN31963_c0_g1;DN57221_c0_g1;DN6117_c0_g1;DN71410_c0_g1;DN58813_c0_g11;DN55746_c0_g1;DN50194_c1_g1;DN87777_c0_g1;DN69202_c0_g1;DN64267_c0_g1;DN52319_c0_g1;DN53298_c1_g5;DN63546_c2_g4;DN85110_c0_g1;DN26596_c0_g1;DN59297_c0_g1;DN50706_c2_g2;DN35402_c0_g1;DN61133_c0_g1;DN48036_c0_g1;DN44867_c0_g2;DN19171_c0_g1;DN63348_c0_g6;DN60677_c0_g1;DN57476_c1_g6;DN56276_c0_g1;DN59321_c0_g1;DN63394_c0_g3;DN54…
growth	687	DN24014_c0_g1;DN61328_c1_g2;DN64324_c0_g2;DN51124_c0_g3;DN78928_c0_g1;DN39927_c0_g1;DN63599_c0_g1;DN31528_c0_g2;DN61780_c0_g1;DN3388_c0_g1;DN13834_c0_g1;DN58229_c0_g3;DN27330_c0_g1;DN68285_c0_g1;DN81394_c0_g1;DN86028_c0_g1;DN62514_c1_g1;DN60918_c0_g3;DN40201_c0_g1;DN44135_c0_g1;DN88146_c0_g1;DN58719_c1_g4;DN58151_c3_g1;DN78912_c0_g1;DN62514_c0_g1;DN59906_c0_g2;DN51057_c1_g1;DN81481_c0_g1;DN32898_…
locomotion	29	DN64291_c0_g1;DN49928_c0_g2;DN64133_c0_g2;DN4205_c0_g1;DN61793_c0_g5;DN32145_c0_g2;DN58474_c0_g5;DN61793_c0_g1;DN58907_c0_g5;DN60753_c0_g1;DN61121_c0_g4;DN34112_c0_g1;DN4770_c0_g1;DN15638_c0_g1;DN55627_c1_g1;DN89859_c0_g1;DN11736_c0_g1;DN34112_c1_g1;DN57049_c0_g1;DN58474_c0_g3;DN63098_c0_g4;DN81477_c0_g1;DN32145_c0_g1;DN58407_c0_g3;DN32037_c0_g1;DN24794_c0_g1;DN63098_c0_g2;DN14819_c0_g1;DN53269_c…
single-organism process	22923	DN82997_c0_g1;DN6480_c0_g1;DN54271_c0_g1;DN55138_c0_g1;DN60610_c2_g2;DN60423_c0_g2;DN31678_c0_g1;DN53373_c0_g2;DN658_c0_g1;DN57278_c0_g1;DN55534_c0_g3;DN31589_c0_g1;DN63210_c1_g2;DN66597_c0_g1;DN27256_c0_g1;DN62996_c0_g1;DN9325_c0_g1;DN25293_c0_g1;DN69514_c0_g1;DN89195_c0_g1;DN31711_c0_g2;DN46768_c0_g1;DN67449_c0_g1;DN56959_c0_g3;DN60205_c0_g1;DN20845_c0_g1;DN2490_c0_g1;DN57591_c0_g2;DN36216_c0_g…
1;DN27206_c0_g1;DN59956_c0_g1;DN47380_c0_g2;DN52016_c0_g2;DN35505_c0_g2;DN64599_c1_g1;DN54106_c1_g1;DN87945_c0_g1;DN41364_c0_g2;DN71213_c0_g1;DN42783_c1_g1;DN38735_c0_g1;DN85154_c0_g1;DN27270_c0_g2;DN69914_c0_g1;DN81091_c0_g1;DN56879_c0_g1;DN35545_c0_g1;DN71665_c0_g1;DN33164_c0_g1;DN63640_c0_g1;DN38464_c0_g1;DN83671_c0_g1;DN49054_c0_g1;DN29875_c0_g2;DN65487_c0_g1;DN29972_c0_g1;DN77906_c0_g1;DN540…
c1_g3;DN7861_c0_g1;DN82467_c0_g1;DN53831_c0_g1;DN58791_c0_g2;DN58449_c0_g1;DN56548_c0_g1;DN63015_c0_g5;DN80696_c0_g1;DN57364_c0_g1;DN53139_c0_g3;DN38327_c0_g1;DN47895_c0_g1;DN69811_c0_g1;DN14_c0_g1;DN69964_c0_g1;DN32601_c0_g1;DN26908_c0_g2;DN87679_c0_g1;DN76679_c0_g1;DN63334_c0_g5;DN46233_c0_g2;DN64728_c0_g1;DN57366_c0_g2;DN25350_c0_g1;DN37752_c0_g1;DN48614_c0_g1;DN72833_c0_g1;DN55184_c0_g1;DN888…
NITY_DN57820_c1_g2;DN60251_c0_g2;DN75832_c0_g1;DN72830_c0_g1;DN51170_c0_g1;DN39505_c0_g2;DN45371_c0_g2;DN61381_c0_g1;DN8319_c0_g1;DN90413_c0_g1;DN63336_c0_g2;DN30611_c0_g1;DN62051_c0_g1;DN5058_c0_g1;DN429_c0_g1;DN80779_c0_g1;DN42282_c0_g1;DN29579_c0_g1;DN71810_c0_g1;DN75967_c0_g1;DN58019_c1_g1;DN43868_c1_g1;DN40748_c0_g1;DN38408_c0_g2;DN45075_c0_g1;DN54298_c0_g3;DN62368_c1_g4;DN59329_c0_g2;DN5020…
34_c0_g2;DN65210_c0_g1;DN72309_c0_g1;DN28947_c0_g1;DN67920_c0_g1;DN8672_c0_g1;DN42093_c0_g1;DN64174_c0_g2;DN86347_c0_g1;DN35118_c1_g1;DN73016_c0_g1;DN56733_c0_g1;DN58020_c0_g1;DN75503_c0_g1;DN47712_c0_g1;DN25278_c0_g1;DN52456_c0_g1;DN45025_c0_g1;DN78521_c0_g1;DN12601_c0_g1;DN37980_c0_g1;DN40997_c0_g1;DN144_c0_g1;DN58080_c0_g1;DN43743_c0_g1;DN70552_c0_g1;DN53763_c0_g1;DN58155_c0_g1;DN81211_c0_g1;D…
92_c0_g1;DN26026_c0_g1;DN85512_c0_g1;DN27752_c0_g1;DN90135_c0_g1;DN60915_c0_g1;DN39900_c1_g1;DN61022_c2_g2;DN7873_c0_g1;DN59382_c0_g2;DN42492_c0_g2;DN87374_c0_g1;DN29448_c0_g1;DN58571_c0_g1;DN53160_c0_g1;DN38131_c0_g1;DN29927_c0_g3;DN88785_c0_g1;DN83553_c0_g1;DN82450_c0_g1;DN83746_c0_g1;DN76841_c0_g1;DN51970_c0_g1;DN49656_c0_g1;DN58681_c0_g2;DN28947_c0_g2;DN72783_c0_g1;DN59694_c0_g3;DN64596_c0_g2…
_g2;DN10113_c0_g1;DN86912_c0_g1;DN76948_c0_g1;DN27476_c0_g2;DN64108_c0_g3;DN30679_c0_g1;DN58368_c1_g4;DN39300_c0_g1;DN91386_c0_g1;DN64724_c3_g11;DN35454_c0_g2;DN56931_c0_g1;DN58372_c0_g1;DN21185_c0_g1;DN59248_c0_g1;DN49915_c0_g1;DN75583_c0_g1;DN20027_c0_g1;DN47593_c0_g3;DN36257_c0_g1;DN41671_c0_g1;DN49519_c5_g1;DN51761_c0_g1;DN66378_c0_g1;DN85353_c0_g1;DN42699_c0_g3;DN32436_c0_g1;DN29948_c0_g1;DN…
DN28547_c0_g1;DN85826_c0_g1;DN76723_c0_g1;DN35799_c0_g1;DN66159_c0_g1;DN58833_c1_g1;DN29279_c0_g2;DN5071_c0_g1;DN62693_c0_g1;DN58536_c1_g1;DN59713_c0_g1;DN44712_c0_g1;DN76650_c0_g1;DN61303_c0_g1;DN42581_c0_g1;DN21604_c0_g1;DN51448_c0_g1;DN68315_c0_g1;DN39223_c0_g1;DN55310_c0_g6;DN53960_c0_g2;DN33747_c0_g1;DN63961_c0_g6;DN53171_c0_g1;DN59001_c0_g1;DN65776_c0_g1;DN46699_c0_g1;DN19674_c0_g1;DN54867_…
g1;DN41035_c0_g1;DN40934_c0_g1;DN62945_c0_g3;DN64620_c0_g6;DN39985_c0_g1;DN45124_c0_g3;DN58164_c0_g1;DN38152_c0_g1;DN59067_c0_g1;DN24356_c0_g2;DN58278_c0_g1;DN8195_c0_g1;DN51803_c0_g1;DN91448_c0_g1;DN57343_c1_g4;DN52156_c0_g1;DN12891_c0_g1;DN65024_c0_g1;DN36208_c0_g1;DN63613_c1_g1;DN56791_c0_g1;DN17575_c0_g1;DN70873_c0_g1;DN77977_c0_g1;DN52719_c1_g1;DN59531_c1_g1;DN64420_c1_g6;DN42768_c0_g1;DN392…
4_c0_g1;DN3374_c1_g1;DN72520_c0_g1;DN88915_c0_g1;DN64251_c0_g2;DN57736_c0_g7;DN78873_c0_g1;DN62221_c0_g2;DN76016_c0_g1;DN76700_c0_g1;DN33903_c0_g1;DN14726_c0_g1;DN51525_c0_g1;DN51937_c0_g1;DN82974_c0_g1;DN63860_c0_g3;DN6795_c0_g2;DN24978_c0_g2;DN14223_c0_g1;DN84241_c0_g1;DN55511_c0_g1;DN78437_c0_g1;DN80196_c0_g1;DN27233_c0_g2;DN62514_c1_g1;DN77448_c0_g1;DN59376_c0_g2;DN39611_c0_g1;DN61395_c1_g2;D…
ITY_DN25277_c0_g1;DN79581_c0_g1;DN31179_c1_g1;DN70856_c0_g1;DN88100_c0_g1;DN81780_c0_g1;DN57731_c0_g1;DN57498_c0_g9;DN58620_c0_g2;DN32507_c0_g1;DN65274_c0_g1;DN57538_c0_g1;DN36775_c0_g1;DN50452_c0_g1;DN55734_c0_g1;DN84293_c0_g1;DN67708_c0_g1;DN49547_c0_g1;DN49155_c0_g1;DN71101_c0_g1;DN60790_c0_g2;DN82384_c0_g1;DN42195_c0_g1;DN43698_c0_g1;DN81362_c0_g1;DN54870_c1_g7;DN19855_c0_g1;DN66337_c0_g1;DN4…
INITY_DN70853_c0_g1;DN34106_c0_g1;DN25757_c0_g1;DN56888_c0_g1;DN7583_c0_g1;DN66903_c0_g1;DN54633_c2_g1;DN30804_c0_g1;DN74576_c0_g1;DN58766_c0_g1;DN43814_c0_g1;DN64677_c0_g6;DN84335_c0_g1;DN52152_c0_g2;DN88821_c0_g1;DN83628_c0_g1;DN28758_c1_g2;DN10452_c0_g1;DN13842_c0_g1;DN54887_c1_g1;DN31127_c0_g1;DN60203_c0_g1;DN61113_c1_g1;DN47353_c0_g1;DN47456_c0_g1;DN19558_c0_g1;DN17888_c0_g1;DN61754_c0_g1;DN…
TY_DN63753_c0_g1;DN63125_c0_g2;DN69469_c0_g1;DN88252_c0_g1;DN5513_c0_g1;DN43043_c0_g1;DN61331_c0_g2;DN62860_c0_g2;DN55474_c0_g1;DN36020_c0_g1;DN89775_c0_g1;DN78394_c0_g1;DN57736_c0_g2;DN56917_c0_g1;DN60104_c0_g1;DN6910_c0_g1;DN30931_c0_g1;DN66873_c0_g1;DN26641_c0_g1;DN62661_c2_g3;DN66163_c0_g1;DN88993_c0_g1;DN34723_c0_g1;DN48923_c0_g1;DN86378_c0_g1;DN87896_c0_g1;DN41095_c0_g1;DN66884_c0_g1;DN8146…
33_c0_g1;DN42459_c0_g1;DN53004_c0_g2;DN43711_c0_g1;DN79493_c0_g1;DN38667_c0_g1;DN64252_c1_g4;DN83345_c0_g1;DN18153_c0_g1;DN62003_c2_g2;DN71666_c0_g1;DN84165_c0_g1;DN65022_c0_g1;DN64452_c0_g1;DN5521_c0_g1;DN59531_c0_g1;DN63738_c0_g1;DN50399_c0_g5;DN39325_c0_g2;DN25733_c0_g2;DN34647_c1_g1;DN60684_c1_g3;DN52025_c0_g4;DN84957_c0_g1;DN59916_c0_g2;DN1513_c0_g1;DN30733_c0_g1;DN54690_c0_g1;DN87913_c0_g1;…
88_c0_g1;DN57502_c0_g1;DN54974_c0_g1;DN82485_c0_g1;DN37999_c0_g1;DN66463_c0_g1;DN82513_c0_g1;DN66861_c0_g1;DN29735_c1_g1;DN921_c0_g1;DN63263_c0_g1;DN24283_c0_g1;DN72821_c0_g1;DN47836_c0_g1;DN42516_c0_g1;DN6822_c0_g2;DN27356_c0_g2;DN72422_c0_g1;DN60720_c2_g1;DN64354_c0_g4;DN71975_c0_g1;DN49354_c1_g2;DN63647_c0_g3;DN64819_c6_g2;DN91412_c0_g1;DN55673_c0_g3;DN39328_c0_g2;DN62951_c0_g2;DN37283_c0_g1;D…
DN760_c0_g1;DN81648_c0_g1;DN35224_c0_g1;DN71059_c0_g1;DN58880_c0_g1;DN42465_c0_g1;DN87847_c0_g1;DN64315_c0_g1;DN42265_c0_g2;DN50821_c0_g2;DN75229_c0_g1;DN43498_c0_g1;DN40025_c1_g1;DN26026_c1_g1;DN64040_c0_g1;DN26894_c1_g1;DN60518_c0_g2;DN45391_c0_g1;DN67493_c0_g1;DN27088_c0_g2;DN51324_c1_g3;DN58459_c0_g1;DN83058_c0_g1;DN64186_c0_g3;DN57052_c0_g2;DN47848_c0_g2;DN87788_c0_g1;DN64568_c3_g1;DN60824_c…
rhythmic process	106	DN49706_c0_g1;DN42468_c0_g1;DN59222_c0_g2;DN41909_c0_g2;DN30872_c0_g2;DN11736_c0_g1;DN44529_c0_g1;DN91057_c0_g1;DN16236_c0_g1;DN63537_c1_g1;DN48075_c0_g1;DN62680_c0_g3;DN85944_c0_g1;DN63160_c0_g1;DN61313_c0_g1;DN53276_c0_g1;DN52197_c0_g1;DN50686_c0_g1;DN45599_c0_g1;DN44163_c0_g1;DN48925_c0_g1;DN12487_c0_g1;DN64779_c1_g3;DN32037_c0_g1;DN62680_c0_g1;DN22654_c0_g1;DN78440_c0_g1;DN39452_c0_g2;DN7252_…
response to stimulus	7968	DN38046_c0_g1;DN72455_c0_g1;DN78337_c0_g1;DN792_c0_g1;DN63560_c1_g5;DN27876_c0_g1;DN17181_c0_g1;DN63181_c1_g1;DN68556_c0_g1;DN48849_c0_g1;DN36973_c0_g1;DN54870_c1_g4;DN14266_c0_g2;DN60401_c0_g2;DN49597_c0_g1;DN67844_c0_g1;DN52600_c0_g2;DN60531_c2_g3;DN81089_c0_g1;DN63762_c0_g2;DN3675_c0_g1;DN61835_c0_g1;DN56408_c0_g1;DN62715_c0_g5;DN35875_c0_g1;DN42767_c0_g1;DN65781_c0_g1;DN62969_c0_g1;DN42784_c0…
040_c0_g2;DN47847_c0_g5;DN59627_c1_g6;DN56847_c0_g1;DN77285_c0_g1;DN59806_c0_g1;DN41490_c0_g2;DN77440_c0_g1;DN45578_c0_g1;DN32238_c0_g1;DN34543_c0_g1;DN36089_c1_g2;DN15673_c0_g1;DN75626_c0_g1;DN64207_c0_g1;DN34830_c0_g2;DN67266_c0_g1;DN58702_c0_g2;DN63545_c0_g1;DN1266_c0_g1;DN62569_c0_g1;DN3565_c0_g1;DN76392_c0_g1;DN14761_c0_g2;DN41863_c0_g1;DN40068_c0_g1;DN36392_c0_g3;DN57085_c0_g1;DN18500_c0_g2…
ITY_DN63359_c2_g7;DN53576_c0_g1;DN61835_c0_g7;DN72740_c0_g1;DN62473_c0_g1;DN51539_c0_g1;DN54676_c0_g1;DN58105_c0_g4;DN55006_c0_g2;DN68999_c0_g1;DN37802_c0_g1;DN61488_c0_g7;DN56786_c0_g2;DN71630_c0_g1;DN331_c0_g2;DN73231_c0_g1;DN53083_c0_g1;DN10343_c0_g1;DN59043_c0_g1;DN68075_c0_g1;DN60888_c0_g4;DN47339_c0_g1;DN63236_c1_g1;DN78514_c0_g1;DN50282_c0_g2;DN38144_c0_g1;DN82176_c0_g1;DN49610_c0_g1;DN187…
Y_DN10904_c0_g1;DN63595_c0_g2;DN47847_c0_g4;DN86006_c0_g1;DN33972_c0_g2;DN61448_c0_g6;DN55453_c0_g1;DN74450_c0_g1;DN90578_c0_g1;DN39115_c0_g1;DN59192_c0_g3;DN71578_c0_g1;DN61964_c0_g1;DN73029_c0_g1;DN52511_c0_g2;DN73462_c0_g1;DN17301_c0_g1;DN64043_c1_g1;DN39844_c0_g1;DN82949_c0_g1;DN23026_c0_g2;DN52860_c0_g2;DN72512_c0_g1;DN77731_c0_g1;DN49899_c0_g1;DN74922_c0_g1;DN69728_c0_g1;DN86701_c0_g1;DN464…
;DN75312_c0_g1;DN51477_c0_g2;DN85983_c0_g1;DN52019_c0_g1;DN62257_c0_g3;DN44461_c0_g1;DN8227_c0_g1;DN75902_c0_g1;DN49389_c0_g2;DN66520_c0_g1;DN49389_c0_g1;DN48838_c0_g1;DN1452_c0_g2;DN42240_c0_g2;DN59063_c0_g4;DN77168_c0_g1;DN62823_c0_g1;DN89309_c0_g1;DN60150_c0_g1;DN72585_c0_g1;DN10641_c0_g1;DN45547_c0_g1;DN45660_c0_g1;DN65455_c0_g1;DN41056_c0_g1;DN66712_c0_g1;DN10263_c0_g1;DN53793_c0_g3;DN36442_…
c0_g1;DN47428_c0_g4;DN82697_c0_g1;DN88687_c0_g1;DN26743_c0_g1;DN59666_c0_g1;DN72024_c0_g1;DN61896_c0_g1;DN28334_c0_g1;DN91093_c0_g1;DN62628_c0_g2;DN90745_c0_g1;DN58949_c2_g1;DN25033_c0_g1;DN67528_c0_g1;DN77489_c0_g1;DN35534_c0_g1;DN60620_c1_g5;DN28852_c0_g1;DN63067_c0_g5;DN78585_c0_g1;DN60775_c2_g3;DN56692_c0_g1;DN75190_c0_g1;DN52842_c0_g2;DN60239_c0_g1;DN61703_c2_g1;DN25861_c0_g1;DN56294_c0_g7;D…
localization	8173	DN60354_c0_g7;DN70143_c0_g1;DN61179_c0_g1;DN4497_c0_g1;DN61580_c0_g2;DN46579_c0_g1;DN52278_c2_g1;DN59744_c0_g1;DN14207_c0_g1;DN86838_c0_g1;DN81115_c0_g1;DN82505_c0_g1;DN85581_c0_g1;DN16223_c0_g1;DN57892_c0_g2;DN76148_c0_g1;DN61544_c0_g5;DN22002_c0_g1;DN89058_c0_g1;DN31284_c0_g1;DN42685_c0_g1;DN41891_c0_g1;DN65156_c0_g1;DN62871_c0_g2;DN30114_c1_g1;DN8246_c0_g1;DN35420_c0_g1;DN45662_c0_g2;DN65791_c…
53714_c0_g1;DN82897_c0_g1;DN47012_c0_g2;DN90422_c0_g1;DN40024_c0_g1;DN76210_c0_g1;DN49976_c0_g1;DN68776_c0_g1;DN72151_c0_g1;DN36316_c0_g2;DN12648_c0_g1;DN88497_c0_g1;DN32622_c0_g2;DN54870_c1_g9;DN40255_c0_g1;DN62754_c1_g1;DN47082_c0_g1;DN81327_c0_g1;DN29585_c0_g1;DN38309_c0_g2;DN22324_c0_g1;DN42430_c0_g3;DN41546_c0_g2;DN11235_c0_g1;DN86206_c0_g1;DN40473_c0_g1;DN78504_c0_g1;DN73695_c0_g1;DN58100_c…
c0_g1;DN62595_c0_g5;DN36948_c1_g1;DN88781_c0_g1;DN18749_c0_g1;DN53963_c0_g1;DN64354_c0_g3;DN29282_c0_g1;DN79911_c0_g1;DN59993_c0_g1;DN41086_c0_g1;DN39440_c1_g1;DN34112_c1_g1;DN27515_c0_g1;DN49170_c0_g1;DN85971_c0_g1;DN53952_c0_g1;DN85485_c0_g1;DN91268_c0_g1;DN32810_c0_g2;DN51968_c0_g2;DN44062_c0_g1;DN24582_c0_g1;DN51657_c0_g2;DN51480_c1_g1;DN65736_c0_g1;DN13143_c0_g1;DN69126_c0_g1;DN58226_c1_g2;D…
;DN60552_c0_g2;DN51774_c1_g1;DN1244_c0_g1;DN90207_c0_g1;DN45181_c0_g2;DN27678_c0_g1;DN16280_c0_g1;DN46786_c0_g1;DN2884_c0_g1;DN75105_c0_g1;DN2779_c0_g1;DN45961_c0_g1;DN3977_c0_g1;DN74170_c0_g1;DN38131_c1_g1;DN24918_c0_g2;DN85871_c0_g1;DN31985_c0_g1;DN72788_c0_g1;DN84110_c0_g1;DN65767_c0_g1;DN9362_c0_g1;DN30878_c0_g1;DN2992_c0_g1;DN57141_c1_g2;DN71553_c0_g1;DN89117_c0_g1;DN19540_c0_g1;DN62969_c0_g…
Y_DN64051_c0_g5;DN75160_c0_g1;DN61331_c1_g1;DN64448_c1_g10;DN90140_c0_g1;DN76631_c0_g1;DN37193_c0_g2;DN54063_c0_g1;DN36033_c0_g1;DN33076_c0_g3;DN57717_c0_g1;DN29987_c0_g2;DN48969_c0_g1;DN40155_c0_g2;DN39844_c0_g1;DN64588_c1_g2;DN52860_c0_g2;DN74450_c0_g1;DN63531_c0_g2;DN25835_c1_g2;DN71585_c0_g1;DN71578_c0_g1;DN71617_c0_g1;DN39115_c0_g1;DN14060_c0_g1;DN73462_c0_g1;DN6398_c0_g1;DN63595_c0_g2;DN478…
_c0_g2;DN74355_c0_g1;DN73727_c0_g1;DN83993_c0_g1;DN68694_c0_g1;DN51384_c0_g1;DN68602_c0_g1;DN65377_c0_g1;DN86248_c0_g1;DN66751_c0_g1;DN43733_c1_g1;DN52382_c0_g1;DN80057_c0_g1;DN48497_c0_g2;DN71080_c0_g1;DN65438_c0_g1;DN30259_c0_g1;DN48912_c0_g2;DN57109_c0_g1;DN44675_c0_g1;DN11686_c0_g1;DN60248_c0_g1;DN32712_c0_g1;DN68079_c0_g1;DN55437_c0_g1;DN47303_c0_g1;DN33715_c0_g1;DN52579_c0_g2;DN45365_c0_g1;…
multi-organism process	1587	DN63793_c1_g1;DN2594_c0_g1;DN61635_c0_g4;DN50701_c0_g1;DN18338_c0_g1;DN43339_c0_g2;DN54308_c0_g1;DN8758_c0_g2;DN78179_c0_g1;DN77566_c0_g1;DN9829_c0_g1;DN58739_c0_g3;DN23026_c0_g1;DN45775_c0_g1;DN40152_c0_g1;DN48196_c0_g1;DN54626_c0_g1;DN62855_c0_g2;DN71396_c0_g1;DN59215_c0_g2;DN71218_c0_g1;DN3588_c0_g1;DN48978_c0_g1;DN44731_c0_g2;DN49419_c0_g1;DN51324_c0_g1;DN58447_c0_g1;DN6076_c0_g1;DN49030_c0_g…
_c0_g1;DN39723_c1_g2;DN62695_c0_g5;DN49477_c0_g3;DN70592_c0_g1;DN24425_c0_g1;DN42449_c0_g1;DN24908_c0_g1;DN52347_c0_g2;DN2503_c0_g1;DN89083_c0_g1;DN51955_c0_g1;DN48906_c0_g1;DN61725_c0_g1;DN43307_c0_g1;DN63599_c0_g1;DN84339_c0_g1;DN49526_c0_g2;DN60918_c0_g3;DN62252_c0_g2;DN81177_c0_g1;DN52883_c0_g1;DN83425_c0_g1;DN71677_c0_g1;DN49477_c0_g5;DN48829_c0_g1;DN56334_c0_g1;DN46165_c0_g1;DN58176_c1_g7;D…
biological regulation	8771	DN59492_c0_g2;DN55225_c0_g1;DN25625_c0_g1;DN83474_c0_g1;DN62650_c0_g2;DN71373_c0_g1;DN9256_c0_g1;DN46520_c0_g2;DN34786_c0_g2;DN48240_c1_g2;DN54368_c1_g3;DN418_c0_g1;DN52961_c1_g1;DN62893_c0_g1;DN59251_c0_g2;DN45690_c0_g1;DN67017_c0_g1;DN34839_c0_g2;DN41224_c0_g2;DN55894_c0_g1;DN8036_c0_g1;DN41386_c0_g2;DN53566_c0_g1;DN16449_c0_g2;DN51697_c0_g1;DN50713_c0_g1;DN49847_c1_g1;DN59711_c0_g1;DN14003_c0_…
RINITY_DN59601_c0_g2;DN53372_c0_g1;DN26520_c0_g1;DN38206_c0_g2;DN86155_c0_g1;DN62613_c0_g3;DN29497_c0_g2;DN50598_c0_g1;DN30780_c0_g1;DN33400_c0_g1;DN78676_c0_g1;DN81361_c0_g1;DN33836_c1_g1;DN74402_c0_g1;DN54981_c1_g1;DN78459_c0_g1;DN26354_c0_g1;DN80320_c0_g1;DN48885_c0_g2;DN43478_c0_g1;DN27693_c0_g1;DN66276_c0_g1;DN54028_c0_g3;DN41881_c0_g1;DN82402_c0_g1;DN17553_c0_g1;DN40764_c0_g1;DN51628_c0_g1;…
NITY_DN21120_c0_g1;DN43205_c0_g1;DN55301_c0_g3;DN57764_c0_g1;DN1758_c0_g1;DN28409_c0_g2;DN68827_c0_g1;DN52061_c0_g1;DN57006_c1_g2;DN35928_c0_g1;DN43073_c0_g1;DN6445_c1_g1;DN77673_c0_g1;DN4941_c0_g1;DN60880_c0_g6;DN37432_c0_g1;DN44318_c0_g1;DN34341_c0_g2;DN52013_c0_g10;DN64770_c2_g5;DN79106_c0_g1;DN72022_c0_g1;DN56094_c0_g1;DN44191_c0_g1;DN61368_c0_g1;DN46361_c0_g1;DN63727_c1_g4;DN23710_c0_g1;DN10…
0_g1;DN64714_c4_g3;DN64692_c2_g3;DN27307_c0_g1;DN19261_c0_g2;DN18500_c0_g1;DN40799_c0_g1;DN75520_c0_g2;DN84694_c0_g1;DN62228_c1_g1;DN55805_c0_g1;DN26369_c0_g1;DN77468_c0_g1;DN42748_c0_g1;DN58400_c0_g1;DN53706_c0_g1;DN59591_c0_g3;DN72596_c0_g1;DN63510_c0_g1;DN457_c0_g1;DN53051_c0_g2;DN70856_c0_g1;DN57538_c0_g1;DN25683_c0_g1;DN52766_c1_g1;DN57731_c0_g1;DN69114_c0_g1;DN35832_c0_g1;DN71503_c0_g1;DN78…
DN57141_c1_g1;DN67986_c0_g1;DN18432_c0_g1;DN47601_c0_g1;DN56980_c0_g1;DN83704_c0_g1;DN56379_c0_g1;DN84891_c0_g1;DN64590_c3_g5;DN72567_c0_g1;DN36062_c0_g2;DN23379_c0_g1;DN55236_c0_g1;DN63685_c0_g2;DN18649_c0_g1;DN41437_c0_g1;DN37065_c0_g2;DN40612_c0_g2;DN86504_c0_g1;DN48975_c0_g1;DN48536_c0_g1;DN48857_c0_g2;DN56473_c0_g3;DN74030_c0_g1;DN55938_c0_g1;DN36760_c0_g1;DN54556_c0_g1;DN89184_c0_g1;DN12983…
ITY_DN89812_c0_g1;DN39939_c0_g1;DN62709_c0_g1;DN4451_c0_g1;DN54438_c0_g1;DN28553_c0_g1;DN59931_c1_g1;DN53933_c0_g1;DN52770_c0_g1;DN54908_c0_g1;DN47233_c1_g1;DN64463_c1_g3;DN80900_c0_g1;DN64790_c0_g4;DN78760_c0_g1;DN64290_c0_g6;DN72236_c0_g1;DN581_c0_g1;DN53164_c0_g1;DN61763_c0_g1;DN60108_c0_g1;DN64066_c0_g1;DN83341_c0_g1;DN1661_c0_g1;DN64070_c2_g3;DN70764_c0_g1;DN91383_c0_g1;DN55781_c0_g1;DN91034…
cellular component organization or biogenesis	6544	DN47616_c0_g1;DN62456_c1_g4;DN77704_c0_g1;DN76463_c0_g1;DN52061_c0_g1;DN21120_c0_g1;DN46461_c0_g1;DN50294_c0_g3;DN44704_c0_g1;DN6445_c1_g1;DN37432_c0_g1;DN44318_c0_g1;DN35928_c0_g1;DN89626_c0_g1;DN57006_c1_g2;DN58045_c0_g1;DN34434_c0_g2;DN83537_c0_g1;DN74429_c0_g1;DN25719_c0_g1;DN77685_c0_g1;DN49743_c1_g1;DN57162_c0_g1;DN38664_c0_g2;DN54228_c0_g3;DN44511_c0_g2;DN87307_c0_g1;DN64843_c3_g3;DN63975_…
DN65309_c0_g1;DN34003_c0_g1;DN90015_c0_g1;DN90888_c0_g1;DN65034_c0_g1;DN58300_c3_g1;DN90694_c0_g1;DN69848_c0_g1;DN91007_c0_g1;DN47617_c0_g1;DN2561_c0_g1;DN39728_c0_g2;DN34435_c0_g1;DN71987_c0_g1;DN49899_c0_g2;DN75150_c0_g1;DN58788_c3_g8;DN67816_c0_g1;DN63158_c1_g1;DN52579_c0_g2;DN90323_c0_g1;DN74809_c0_g1;DN59562_c0_g1;DN60959_c0_g2;DN45706_c1_g1;DN36810_c0_g3;DN64171_c3_g4;DN45116_c0_g5;DN87003_…
;DN50465_c0_g1;DN88168_c0_g1;DN55538_c0_g1;DN57165_c0_g1;DN53203_c0_g1;DN88812_c0_g1;DN62441_c0_g2;DN77178_c0_g1;DN43208_c0_g1;DN56888_c0_g2;DN29421_c0_g1;DN58574_c0_g1;DN75762_c0_g1;DN24532_c0_g2;DN64515_c1_g1;DN87680_c0_g1;DN51581_c0_g1;DN63558_c0_g2;DN14251_c0_g1;DN51865_c1_g1;DN63647_c0_g7;DN351_c0_g1;DN64290_c0_g11;DN61187_c0_g2;DN55859_c0_g1;DN54047_c0_g1;DN61570_c1_g1;DN39991_c0_g1;DN75931…
N6845_c0_g1;DN19445_c0_g1;DN12898_c0_g1;DN53312_c0_g1;DN38224_c0_g1;DN63735_c0_g1;DN78388_c0_g1;DN46183_c0_g1;DN56669_c0_g1;DN54368_c1_g3;DN85868_c0_g1;DN26630_c0_g2;DN66655_c0_g1;DN47203_c0_g1;DN60173_c1_g2;DN64093_c0_g1;DN59330_c0_g3;DN75445_c0_g1;DN50646_c0_g1;DN75980_c0_g1;DN80040_c0_g1;DN61394_c2_g1;DN32026_c0_g2;DN52151_c1_g1;DN37697_c0_g1;DN22802_c0_g1;DN80929_c0_g1;DN52106_c0_g1;DN64639_c…
DN57581_c0_g1;DN61130_c1_g3;DN64567_c0_g2;DN35323_c1_g1;DN43358_c0_g1;DN69610_c0_g1;DN50360_c0_g1;DN44159_c0_g2;DN13834_c0_g1;DN41880_c0_g1;DN83452_c0_g1;DN73223_c0_g1;DN39927_c0_g1;DN2746_c0_g1;DN33554_c0_g1;DN84787_c0_g1;DN22509_c0_g1;DN57498_c0_g10;DN63634_c0_g1;DN35808_c0_g1;DN62098_c0_g2;DN86028_c0_g1;DN56292_c0_g2;DN36516_c0_g1;DN58719_c1_g4;DN59954_c0_g1;DN52742_c0_g1;DN75916_c0_g1;DN74571…
